# Supplementary material for: Acupuncture for chronic neck pain with sensitive points: study protocol for a multicentre randomised controlled trial
Source: PubMed Central journal article supplement — BMJ Open. 2019 Jul 30;9(7):e026904. doi: 10.1136/bmjopen-2018-026904 (PMC6678032; doi:10.1136/bmjopen-2018-026904), 2019-07-30
Supplement: bmjopen-2018-026904.draft_revisions.pdf [file bmjopen-2018-026904.draft_revisions.pdf]

# BMJ Open

BMJ Open is committed to open peer review. As part of this commitment we make the peer review history of every article we publish publicly available.

When an article is published we post the peer reviewers' comments and the authors' responses online. We also post the versions of the paper that were used during peer review. These are the versions that the peer review comments apply to.

The versions of the paper that follow are the versions that were submitted during the peer review process. They are not the versions of record or the final published versions. They should not be cited or distributed as the published version of this manuscript.

BMJ Open is an open access journal and the full, final, typeset and author-corrected version of record of the manuscript is available on our site with no access controls, subscription charges or pay-per-view fees (<http://bmjopen.bmj.com>).

If you have any questions on BMJ Open's open peer review process please email [info.bmjopen@bmj.com](mailto:info.bmjopen@bmj.com)

# BMJ Open

## Acupuncture for chronic neck pain with sensitized points: study protocol for a multicenter randomized controlled trial

|                               |                                                                                                                                                                                                                                                                                                                                                                                                                                                                                                                                                                                                                                                                                                                                                                                                                                                                                                        |
|-------------------------------|--------------------------------------------------------------------------------------------------------------------------------------------------------------------------------------------------------------------------------------------------------------------------------------------------------------------------------------------------------------------------------------------------------------------------------------------------------------------------------------------------------------------------------------------------------------------------------------------------------------------------------------------------------------------------------------------------------------------------------------------------------------------------------------------------------------------------------------------------------------------------------------------------------|
| Journal:                      | <i>BMJ Open</i>                                                                                                                                                                                                                                                                                                                                                                                                                                                                                                                                                                                                                                                                                                                                                                                                                                                                                        |
| Manuscript ID                 | bmjopen-2018-026904                                                                                                                                                                                                                                                                                                                                                                                                                                                                                                                                                                                                                                                                                                                                                                                                                                                                                    |
| Article Type:                 | Protocol                                                                                                                                                                                                                                                                                                                                                                                                                                                                                                                                                                                                                                                                                                                                                                                                                                                                                               |
| Date Submitted by the Author: | 26-Sep-2018                                                                                                                                                                                                                                                                                                                                                                                                                                                                                                                                                                                                                                                                                                                                                                                                                                                                                            |
| Complete List of Authors:     | Sun, Mingsheng; Chengdu University of Traditional Chinese Medicine, College of Acupuncture and Tuina<br>Geng, Guoyan; Chengdu University of Traditional Chinese Medicine, College of Acupuncture and Tuina<br>Chen, Jiao; Chengdu University of Traditional Chinese Medicine, Ma, Xingsha; Chengdu University of Traditional Chinese Medicine<br>Yan, Mingxi; Chengdu University of Traditional Chinese Medicine<br>Liu, Xiaojia; Chengdu University of Traditional Chinese Medicine<br>Du, Jiarong; Chengdu University of Traditional Chinese Medicine<br>Cai, Dingjun; Chengdu University of Traditional Chinese Medicine<br>Zheng, Hui<br>Zhao, Ling; Chengdu University of Traditional Chinese Medicine, Acupuncture and Tuina School<br>Liang, Fan-rong; Chengdu University of Traditional Chinese Medicine, Acu-moxibustion and Tuina school; Chengdu University of Traditional Chinese Medicine |
| Keywords:                     | acupuncture, sensitized points, chronic neck pain, study protocol, pressure pain threshold                                                                                                                                                                                                                                                                                                                                                                                                                                                                                                                                                                                                                                                                                                                                                                                                             |
|                               |                                                                                                                                                                                                                                                                                                                                                                                                                                                                                                                                                                                                                                                                                                                                                                                                                                                                                                        |

SCHOLARONE™  
Manuscripts

1  
2  
3 **Acupuncture for chronic neck pain with sensitized points: study protocol for a**  
4 **multicenter randomized controlled trial**  
5  
6  
7

8 Ming-Sheng Sun<sup>†</sup>, Guo-Yan Geng<sup>†</sup>, Jiao Chen<sup>†</sup>, Xing-Sha Ma, Ming-Xi Yan, Xiao-Jia Liu,  
9 Jia-Rong Du, Ding-Jun Cai, Hui Zheng, Ling Zhao\*, Fan-Rong Liang\*  
10  
11  
12  
13

14 <sup>†</sup>Mingsheng Sun, Guoyan Geng, and Jiao Chen contributed equally to this work.  
15

16  
17  
18 College of Acupuncture and Tuina, Chengdu University of Traditional Chinese Medicine,  
19 Chengdu, 610075, China  
20  
21  
22

23 **\*Corresponding authors**  
24

25 Professor Ling Zhao  
26

27 Postal address: 37 Shierqiao Road, Chengdu, Sichuan, China  
28

29 Telephone: +86 13568801429  
30

31 Email: [ling94@163.com](mailto:ling94@163.com)  
32  
33

34 Professor Fan-Rong Liang  
35

36 Postal address: 37 Shierqiao Road, Chengdu, Sichuan, China  
37

38 Telephone: +86 13608058216  
39

40 Email: [acuresearch@126.com](mailto:acuresearch@126.com)  
41  
42

43 **Word count:**  
44

45 3,066 words  
46  
47  
48

49 **Keywords:**  
50

51 acupuncture, sensitized points, chronic neck pain, study protocol, pressure pain threshold  
52  
53  
54  
55  
56  
57  
58  
59  
60

## ABSTRACT

**Introduction:** Chronic neck pain is a challenging condition to treat in clinical practice, and has a considerable impact on quality of life and disability. This study aims to evaluate the efficacy and safety of needling at sensitized acupoints in providing pain relief, improvement of cervical vertebral function, and quality of life in patients with chronic neck pain.

**Methods and analysis:** This multicenter randomized controlled clinical trial will include 716 patients with chronic neck pain. Study participants will be randomly assigned in a 1:1:1:1 ratio to four treatment groups: the highly-sensitized acupoints group, low/non-sensitized acupoints group, sham acupuncture group, and waiting-list control group. The highly-sensitized acupoints group will receive acupuncture at five sensitized acupoints, while the low/non-sensitized acupoints group will receive acupuncture at five low/non-sensitized acupoints; the absolute value of the change in pressure pain threshold will be calculated at each of these five acupoints. The sham acupuncture group will receive shallow acupuncture at five non-acupoints. These three groups will receive 10 acupuncture sessions in 4 weeks: three times weekly for the first 2 weeks, and twice weekly for the subsequent 2 weeks. The waiting-list control group will not receive acupuncture treatment until the end of the 24-week follow-up period. The primary outcome will be the change in the visual analogue scale pain score from baseline to 4 weeks. Secondary outcomes will be the Northwick Park Neck Pain Questionnaire and McGill pain questionnaire, 12-item Short-Form health survey, Neck Disability Index, changes in the pressure pain threshold, range of cervical motion, Self-Rating Anxiety Scale, and Self-Rating Depression Scale at 0, 4, 8, 12, 16, 20, and 24 weeks.

**Ethics and dissemination:** Ethical approval of this study has been granted by local Institutional Review Board (ID: 2017KL-38). The outcomes of the trial will be disseminated through peer-reviewed publications.

**Trial registration:** ChiCTR1800016371.

### Strengths and limitations of this study

- ▶ This study will be the first randomized controlled trial to evaluate the efficacy and safety of acupuncture at sensitized points in patients with chronic neck pain.
- ▶ To test the efficacy of acupuncture at sensitized acupoints, the trial will include three kinds of

control groups (low/non-sensitized acupoints acupuncture group, sham acupuncture group, and waiting-list control group), and strict quality control will be conducted, including adequate concealment of randomized group allocations.

► A limitation of this study is that acupuncture at the low/non-sensitized acupoints may play a role in the treatment of chronic neck pain, and the sham acupuncture may also be associated with treatment effects than other placebo; thus, the effect of acupuncture in the highly-sensitized acupoints group may be underestimated.

## INTRODUCTION

Chronic neck pain can be caused by dysfunction of various structures in the neck, and can manifest as episodic pain and/or stiffness.(1, 2) The prevalence of neck pain in the adult general population reportedly varies from 30–50% worldwide.(3) Furthermore, neck pain-related diseases, such as cervical spondylosis, occur in 64.52% of subjects working in certain occupations in China.(4) Neck pain is the third most common chronic condition causing persistent pain in the US, and the fourth leading cause of disability worldwide.(5, 6) Chronic neck pain can lead to work absenteeism(7) or a heavy medical burden.(8) Several risk factors predispose to the development of chronic neck pain, including obesity, a sedentary lifestyle, previous neck pain, cervical disc degeneration, and poor general health. The current mainstay of treatment for chronic neck pain is non-steroidal anti-inflammatory drugs, but they are associated with many adverse reactions, such as gastrointestinal, cardiac, and renal toxicity.(9)

Although clinical trials have demonstrated that acupuncture can effectively relieve chronic neck pain,(10) the effect of acupuncture treatment is closely related to the selection of acupoints.(11) One study evaluating the effects of acupuncture on chronic neck pain showed that acupuncture at common distant acupoints is more effective than that at myofascial trigger points,(12) while another study found that acupuncture at local myofascial trigger points also has a good analgesic effect.(13) However, some studies have also reported that acupuncture does not relieve pain.(14, 15) Despite the increasing amount of randomized clinical trials (RCTs) investigating the effect of acupuncture, the quality of these RCTs needs to be improved, as many include inadequate sample sizes,(16) short follow-up,(17) an absence of sham acupuncture and non-treatment as control treatments,(18) no objective assessment method,(19) or a lack of individualized treatment based

1  
2  
3 on each patient's condition.(20) Consequently, the efficacy of acupuncture for chronic neck pain  
4 needs further evaluating due to the lack of objective clinical evidence.  
5

6  
7 The pressure pain threshold (PPT) is a semi-objective method used to quantify localized pain.(21,  
8  
9 22) Clinical studies have confirmed that the PPT at acupoints changes when patients are in a  
10  
11 diseased state.(23-25) The degree of change in the PPT may reflect the intensity of acupoint  
12  
13 sensitization, and may be related to the disease status.(26) Clinical studies have found that  
14  
15 performing acupuncture at sensitized points achieves a superior effect.(27, 28) However, no study  
16  
17 has yet focused on the efficacy of acupuncture at sensitized points for the treatment of chronic  
18  
19 neck pain. Therefore, we herein describe the protocol for a RCT that aims to evaluate the efficacy  
20  
21 of acupuncture at sensitized points (acupoints or tender points) in relieving neck pain and  
22  
23 improving cervical vertebral function and quality of life.  
24

## 25 **METHODS AND ANALYSIS**

### 26 **Objective**

27  
28 To assess the efficacy and safety of acupuncture at highly-sensitized acupoints in relieving pain  
29  
30 and improving the cervical vertebral function and quality of life in patients with chronic neck pain.  
31  
32

### 33 **Trial design**

34  
35 This is a prospective, multicenter RCT in which patients will be allocated to four parallel  
36  
37 treatment groups using a 1:1:1:1 allocation ratio. The protocol was developed in accordance with  
38  
39 the Consolidated Standards of Reporting Trials guidelines(29) and the Standards for Reporting  
40  
41 Interventions in Clinical Trials of Acupuncture guidelines(30). The trial has been registered with  
42  
43 ChiCTR at Current Controlled Trials (ChiCTR1800016371). A flowchart of the trial design is  
44  
45 shown in Figure 1.  
46  
47  
48

### 49 **Inclusion criteria**

50  
51 The inclusion criteria will be: (1) males or females aged 18–75 years; (2) neck pain or limited  
52  
53 cervical activity as the main complaint; (3) pain or discomfort visual analogue scale (VAS) score  
54  
55 of  $\geq 30$  for at least 5 days within 1 week; (4) chronic neck pain for the last 3 months; (5) provision  
56  
57 of written informed consent for all procedures in this trial.  
58  
59

### **Exclusion criteria**

Patients meeting any one of the following criteria will be excluded: (1) history of neck fracture or surgery, or cervical congenital abnormality; (2) serious disease related to the heart, liver, kidney, or hematopoietic system; (3) difficulty in answering the questionnaires because of cognitive impairment; (4) dermatopathy and hemorrhagic diseases; (5) those who are pregnant, breastfeeding, or planning a pregnancy during the study period; (6) participation in other trials.

### **Recruitment strategies and randomization**

We will enroll patients from the outpatient departments of Acupuncture and Moxibustion, and Orthopedics in four clinical centers in China: Chengdu University of Traditional Chinese Medicine, Shaanxi University of Traditional Chinese Medicine, Shanxi University of Traditional Chinese Medicine, and Guiyang College of Traditional Chinese Medicine. Recruitment strategies will include posting recruitment advertisements on social media (such as WeChat, which is similar to Facebook) and at community centers. Patients who consent to study participation will be examined by a hospital doctor who will make a diagnosis; an inspector will then perform a baseline evaluation. The inspector will apply for the grouping randomization after completing the PPT measurement.

Central randomization will be performed using stratified and permuted blocks. The inspectors will be registered in the randomization center (located in Brightech-Magnsoft Data Services Company), and will be trained to apply for randomization through the online website. This guarantees that randomization concealment is adequate.

### **Blinding**

The inspector will be responsible for clinical reception, PPT measurement, and randomization. The acupuncture treatments will be performed by acupuncturists who have each held a practitioners license for more than 5 years. The efficacy of acupuncture will be evaluated by an assessor. Patients who receive acupuncture treatment will not be aware of their group assignment; however, the waiting-list control group cannot be blinded. The patients, inspectors, acupuncturists, assessors, and statisticians will not be permitted to have any communication with each other

regarding study information.

### **PPT measurement**

The PPT is widely used in clinical practice as a semi-objective method with which to quantify localized pain.(21, 22) Individuals with chronic neck pain have altered pain sensitivity,(31-33) and so the PPT can be used to distinguish between patients with neck pain and healthy subjects.(34) In accordance with the results of literature data-mining and expert consensus on the treatment of chronic neck pain, we identified the 15 most frequently used acupoints (Table 1) and the five regions of the body with the most frequent occurrence of pain and the greatest degree of acupoint sensitization (Figure 2). The body was divided into five regions to standardize the treatment procedures and detection areas.

Inspectors will mark the 15 acupoints on each patient. The inspector will then palpate the detection area associated with each acupoint using the appropriate force (< 2,000 gf), and will identify the sensitized points that have pain/sourness/heaviness/fullness or nodules. Inspectors will use the FDIX Force Gauge (Force One™ FDIX, Wagner Instruments, USA) to make two measurements of the PPT at each of the 15 acupoints in the five regions. If there is a difference between the two PPT measurements of more than 500 gf at one acupoint, the acupoint will be measured for the third time. Progressive pressure will be applied at a rate of 100 gf/s at each acupoint. The PPTs will be summed to calculate the average. The absolute value of the change in the PPT in the included patients will then be calculated, and this will be compared with that of healthy subjects collected in the early stage (Appendix Table).

**Table 1** Acupoints selected for use in the study

| <b>Acupoints</b>    | <b>Location</b>                                                                                                                                      |
|---------------------|------------------------------------------------------------------------------------------------------------------------------------------------------|
| Jianjing (GB-21)    | On the shoulder, directly above the nipple, at the midpoint of the line connecting Dazhui(DU-14) with the acromial end of clavicle                   |
| Jianzhongshu(SI-15) | On the back, 2 cun lateral to the lower border of the spinous process of the 7 <sup>th</sup> cervical vertebra                                       |
| Wangu(GB-12)        | On the head, in the depression posterior and inferior to the mastoid process.                                                                        |
| Fengchi(GB-20)      | On the nape, below the occipital, on a level with Fengfu DU-16, in the depression between the upper portion of trapezius and the sternocleidomastoid |



|    |                   |                                                                                              |
|----|-------------------|----------------------------------------------------------------------------------------------|
| 1  |                   |                                                                                              |
| 2  |                   |                                                                                              |
| 3  | Tianzhu(BL-10)    | On the nape, 1.3 cun lateral to the posterior hairline, in the depression                    |
| 4  |                   | of the posterior hairline lateral to the trapezius muscle                                    |
| 5  | Dazhui(DU-14)     | On the posterior median line, in the depression below the spinous                            |
| 6  |                   | process of the 7 <sup>th</sup> cervical vertebra                                             |
| 7  |                   |                                                                                              |
| 8  | Dazhu(BL-11)      | On the back, 1.5 cun lateral to the lower border of the spinous process                      |
| 9  |                   | of the 1 <sup>st</sup> thoracic vertebra                                                     |
| 10 | Jianwaishu(SI-14) | On the back, 3 cun lateral to the lower border of the spinous process of                     |
| 11 |                   | the first thoracic vertebra                                                                  |
| 12 | Tianliao(SJ-15)   | On the region of scapula, at the midpoint of the line connecting                             |
| 13 |                   | Jianjing GB-21 with Quyuan SI-13, on the superior angle of the                               |
| 14 |                   | scapula                                                                                      |
| 15 |                   |                                                                                              |
| 16 | Jugu(LI-16)       | In the upper portion of the shoulder, in the depression between the                          |
| 17 |                   | acromial end of clavicle and the scapular spine                                              |
| 18 | Tianzong(SI-11)   | In the region of the scapula, in the depression of the center of the                         |
| 19 |                   | subscapular fossa, on a level with the 4 <sup>th</sup> thoracic vertebra                     |
| 20 |                   |                                                                                              |
| 21 | Shousanli(LI-10)  | Flexing the elbow, on the dorsal radial side of the forearm, on the line                     |
| 22 |                   | connecting Yangxi LI-5 with Quchi LI-11, 2cun below the transverse                           |
| 23 |                   | cuticular crease                                                                             |
| 24 |                   |                                                                                              |
| 25 | Lieque(LU-7)      | On the radial margin of the forearm, 1.5 cun above the transverse                            |
| 26 |                   | crease of the wrist, between the branchioradial muscle and the long                          |
| 27 |                   | abductor muscle tendon of thumb                                                              |
| 28 |                   |                                                                                              |
| 29 | Zhongzhu(SJ-3)    | On the dorsum of the hand, in the depression between the 4 <sup>th</sup> and 5 <sup>th</sup> |
| 30 |                   | metacarpal bones, proximal to the 4 <sup>th</sup> metacarpalangeal joint                     |
| 31 | Houxi(SI-3)       | On the ulna side of the palm, proximate to the fifth                                         |
| 32 |                   | metacarpophalangeal joint, at the end of transverse crease of                                |
| 33 |                   | metacarpophalangeal joint, at the dorsoventral boundary                                      |
| 34 |                   |                                                                                              |

### Interventions

#### 1) Highly-sensitized acupoints group

The acupuncturist will identify the five sensitized points/acupoints at which the absolute value of change in the PPT is the largest. Acupuncture will be performed at these five acupoints three times weekly for the first 2 weeks, and then two times weekly for the subsequent 2 weeks, giving a total of 10 sessions. Each of the five selected acupoints will be punctured using a stainless steel needle (0.25 × 40 mm), and the Deqi sensation (a sensation of distension or numbness, or a twitch response) will be achieved. Needle retention time will be 30 min. The PPT of the sensitized acupoints will be evaluated every 2 weeks, and the selection of acupuncture points will be adjusted as each patient's condition changes; this will ensure the implementation of individualized treatment.

## 2) Low/non-sensitized acupoints group

The acupuncturist will identify the five sensitized acupoints with the least change in the absolute value of the PPT, and acupuncture will be performed at these five acupoints. The puncture method and needles will be the same as for the highly-sensitized acupoints group.

## 3) Sham acupuncture group

Acupuncture will be performed at five non-acupoints. The protocol for choosing the non-acupoints was developed in our previous clinical trial(35) and another study(36) (Table 2 and Figure 3). Shallow acupuncture will be applied at the five non-acupoints, without attempting to yield the Deqi sensation.

**Table 2** Details of the intervention in the sham acupuncture group

| <b>Non-acupoint</b>   | <b>Location</b>                                                                                                               | <b>Manipulation</b>                       |
|-----------------------|-------------------------------------------------------------------------------------------------------------------------------|-------------------------------------------|
| <b>Non-acupoint 1</b> | In the middle of Binao(LI 14) and acromion                                                                                    | punctured<br>perpendicularly<br>0.5–1 cun |
| <b>Non-acupoint 2</b> | At the medial arm on the anterior border of the insertion of the deltoid muscle at the junction of deltoid and biceps muscles |                                           |
| <b>Non-acupoint 3</b> | Half way between the tip of the elbow and axillae                                                                             |                                           |
| <b>Non-acupoint 4</b> | Ulnar side, half way between the epicondylus medialis of the humerus and ulnar side of the wrist                              |                                           |
| <b>Non-acupoint 5</b> | Edge of the tibia 1–2 cm lateral to the Zusanli (ST36)<br>horizontally                                                        |                                           |

## 4) Waiting-list control group

No intervention will be performed in the waiting-list control group in the initial 24 weeks after randomization. The participants will be informed that they are scheduled to receive 10 free acupuncture treatments at the end of the 24-week follow-up period. If the participants experience severe neck pain during the initial 24 weeks, they will be permitted to take prescribed analgesic

1  
2  
3 medications (such as non-steroidal anti-inflammatory drugs) or effective analgesic medications  
4 that they are accustomed to taking, and the details will be recorded on the Case Report Form.  
5  
6  
7

### 8 **Outcome measurements**

9  
10 Follow-up examinations will be performed at 0, 4, 8, 12, 16, 20, and 24 weeks after randomization  
11 in all four groups (Table 3).  
12  
13  
14

### 15 **Primary outcome**

16  
17 The primary outcome will be the change in the VAS score from baseline to 4 weeks. The VAS  
18 score ranges from 0–100, with higher scores indicating a greater degree of pain.  
19  
20  
21  
22

### 23 **Secondary outcomes**

#### 24 **Pain**

25  
26 The intensity of neck pain will be measured using the Northwick Park Neck Pain Questionnaire  
27 and the McGill Pain Questionnaire. The changes in the PPT during the treatment phase will be  
28 evaluated. The times and doses of analgesic drugs taken during the study period, and the  
29 disease-related treatment performed during the follow-up period will also be recorded.  
30  
31  
32  
33  
34  
35

#### 36 **Quality of life**

37  
38 Quality of life will be assessed using the Chinese version of the Medical Outcome Study  
39 Short-form 12-Item Health Survey.  
40  
41  
42

#### 43 **Neck function**

44  
45 The change in neck function will be evaluated using the Neck Disability Index and the cervical  
46 range of motion. Recent research has shown that the Neck Disability Index has an excellent ability  
47 to distinguish between patients with different levels of perceived dysfunction.(37)  
48  
49  
50  
51

#### 52 **Emotional disorders**

53  
54 Chronic pain is often accompanied by emotional disorders.(38, 39) Changes in mood will be  
55 assessed using the Self-Rating Anxiety Scale and the Self-Rating Depression Scale.  
56  
57  
58  
59  
60

**Table 3** Outcome measurements at each timepoint

| Measurements                            | Baseline | Treatment phase |         |         | Follow-up phase |          |          |          |          |
|-----------------------------------------|----------|-----------------|---------|---------|-----------------|----------|----------|----------|----------|
|                                         | -4 weeks | 0 week          | 2 weeks | 4 weeks | 8 weeks         | 12 weeks | 16 weeks | 20 weeks | 24 weeks |
| Measurements of pressure-pain threshold |          | ×               | ×       | ×       |                 |          |          |          |          |
| VAS                                     | ×        | ×               |         | ×       | ×               | ×        | ×        | ×        | ×        |
| NPQ                                     |          | ×               |         | ×       | ×               | ×        | ×        | ×        | ×        |
| MPQ                                     |          | ×               |         | ×       | ×               | ×        | ×        | ×        | ×        |
| SF-12                                   |          | ×               |         | ×       | ×               | ×        | ×        | ×        | ×        |
| NDI                                     |          | ×               |         | ×       | ×               | ×        | ×        | ×        | ×        |
| CROM                                    |          | ×               |         | ×       |                 |          |          |          |          |
| SAS                                     |          | ×               |         | ×       | ×               | ×        | ×        | ×        | ×        |
| SDS                                     |          | ×               |         | ×       | ×               | ×        | ×        | ×        | ×        |
| Adverse events                          |          | ×               | ×       | ×       | ×               | ×        | ×        | ×        | ×        |

### Data and Safety Monitoring Board

To ensure the integrity of the RCT and protect the rights and health of the participants, we will set up a Data and Safety Monitoring Board. The Data and Safety Monitoring Board is an independent advisory group that will maintain the scientific and ethical standards of the RCT, and will be responsible for data evaluation during the study period. The Data and Safety Monitoring Board will be developed in accordance with the Operational Guidelines for the Establishment and Functioning of Data and Safety Monitoring Boards of the World Health Organization.

### Safety and acupuncture-related adverse events

Acupuncture may cause several adverse events, including bleeding, hematoma, fainting, serious pain, and local infection.<sup>(40)</sup> Hence, we will record any acupuncture-related adverse events that occur during the treatment and follow-up phases, and record the potential reasons for these adverse events. The number and type of adverse events in each group will be calculated. Patients will receive appropriate intervention for any adverse events that occur. Serious adverse events will be immediately reported to the primary investigator, and the affected participants will be withdrawn from the study.

### Sample size calculation

The sample size calculation was based on the superiority test. The primary outcome is the change in the VAS score from baseline to week 4. The clinical difference in the VAS score after acupuncture treatment is reportedly 6.3(16); therefore, we conservatively estimated that there would be a VAS score change of 5 between the highly-sensitized acupoints group and the low/non-sensitized acupoints group, 10 between the highly-sensitized acupoints group and the sham acupuncture group, and 20 between the highly-sensitized acupoints group and the waiting-list control group. Considering a two-sided significance level of 5% and power of 95%, 621 participants are required with a 1:1:1 group allocation rate, as calculated by Fisher's exact test in G\*Power (version 3.1.5). To minimize attrition bias, we assumed a dropout rate of 15%, making it necessary to include at least 716 participants in total.

### Statistical analysis

The included patients will be divided into the full analysis set (FAS), per protocol set (PPS), and safety set (SS). The FAS population will consist of all participants for whom the primary outcome is evaluable. The FAS population will be used as the primary population for all efficacy analyses. The PPS population will consist of all participants who undergo the planned interventions. The SS will consist of all randomized participants who received at least one acupuncture treatment during the study period. All data will be managed by the data coordinating center through a third party (the Brightech-Magnsoft Data Services Company).

A statistician blinded to the group allocations will conduct all analyses using the SAS version 9.4 software package (SAS Institute Inc., Cary, NC, USA). The intention-to-treat principle will be used to analyze the baseline characteristics data and outcome data. Measurement data will be expressed as the mean  $\pm$  SD, while enumeration data will be expressed as percentages. If an adjustment is needed for an incomparable baseline, covariance analysis will be performed. If the measurement data have normal distribution, the t-test will be used. If the measurement data have non-normal distribution, the Wilcoxon rank sum test will be used. A p value of less than 0.05 will be considered statistically significant.

### ETHICS AND DISSEMINATION

1  
2  
3 This RCT was designed in accordance with the principles of the Declaration of Helsinki. The trial  
4 protocol has been approved by the Ethics Committee of the First Affiliated Hospital of Chengdu  
5 University of Traditional Chinese Medicine (permission number: 2017KL-38), and is registered on  
6 the primary registry in the World Health Organization registry network (Chinese Clinical Trial  
7 Registry: no. ChiCTR1800016371). Signed consent will be obtained from each patient after they  
8 have been informed of the study procedures, possible risks, and their right to withdraw from the  
9 trial.  
10

11  
12 The concept of sensitized points comes from the theory of traditional Chinese medicine, which  
13 purports a link between disease status and the condition of acupuncture points; when the body is  
14 affected by diseases, particular points become sensitized(41). This study will be the first  
15 multicenter RCT to evaluate the safety and effectiveness of acupuncture at sensitized points for  
16 chronic neck pain. There is a need for non-pharmacological modalities that effectively relieve pain,  
17 as there has been a sharp increase in the incidence of opioid abuse, misuse, and overdose in the  
18 US.(42) The relief of physical pain is the most commonly reported reason for opioid misuse  
19 (63.4%).(43) Acupuncture is a popular non-pharmacological pain-relieving modality that may  
20 exert its analgesic properties via the release of endogenous opioids.(44) The results of this study  
21 may provide further evidence for the effectiveness of acupuncture in relieving chronic neck pain,  
22 and may thus lead to a reduction in the prescription of opioids.  
23  
24

25  
26 This study has some strength that warranted mention. The creation of a waiting-list control group  
27 will enable the diagnostic component of the study to be maintained,(45) as this will rule out  
28 self-healing of the disease, and control for the Hawthorne effect. The waiting-list control group  
29 will receive the same acupuncture intervention after the 24-week follow-up period. This design  
30 provides participants with a guarantee that they are going to receive acupuncture treatment,  
31 overcoming the potential problem of control participants being disappointed.(46) In addition, the  
32 blinding of the outcome evaluators will decrease potential bias.  
33  
34

35  
36 As this will be the first study to investigate the effectiveness of acupuncture at sensitized  
37 acupoints for chronic neck pain, this RCT may have some limitations. The main problem is that  
38 the acupuncture performed in the low/non-sensitized acupoints group may still produce a  
39 treatment effect for chronic neck pain; hence, the effect of acupuncture in the highly-sensitized  
40 acupoints group may be underestimated. Further study is needed to confirm the efficacy of  
41  
42  
43  
44  
45  
46  
47  
48  
49  
50  
51  
52  
53  
54  
55  
56  
57  
58  
59  
60

1  
2  
3 acupuncture at sensitized acupoints. If the results show that acupuncture therapy at sensitized  
4 acupoints is safe and effective in reducing chronic neck pain, this study provide evidence to  
5 support the superior clinical efficacy of performing acupuncture at sensitized acupoints compared  
6 with low/non-sensitized acupoints.  
7  
8  
9

## 10 11 12 **CONCLUSION**

13  
14 This article describes the design and protocol of a study that aims to evaluate the effectiveness and  
15 safety of acupuncture for chronic neck pain. The results will reveal whether sensitized acupoints  
16 have specificity, and whether acupuncture at highly-sensitized acupoints is superior to acupuncture  
17 at low/non-sensitized points or sham acupuncture at non-acupoints.  
18  
19  
20

## 21 22 23 **Trial status**

24  
25 This study is currently in the recruitment phase. The first patient was enrolled in June 2018, and  
26 the study is expected to end in December 2019.  
27  
28  
29

## 30 31 32 **Acknowledgments**

33 We thank the staff of Brightech-Magnsoft Data Services Company for their substantial  
34 contributions to the design and statistical analysis plan of this trial. We thank the staff of Chengdu  
35 CTC Tianfu Digital Technology Inc. for providing images. We acknowledge the help and  
36 contributions from the inspectors, acupuncturists, experts, and investigators in each center. We  
37 thank the patients with chronic neck pain for participating in this trial. We also thank Dr. Kelly  
38 Zammit, BVSc, from Liwen Bianji, Edanz Group China ([www.liwenbianji.cn/ac](http://www.liwenbianji.cn/ac)), for editing the  
39 English text of a draft of this manuscript.  
40  
41  
42  
43  
44  
45

## 46 47 48 **Authors' contributions**

49 MSS, GYG, JC, HZ, LZ, and FRL participated in the design of the trial, in creating the data  
50 analysis plan, and in drafting the manuscript. XSM, MXY, XJL, and JRD collected the  
51 information needed for the performance of this trial in each center. All of the authors discussed,  
52 read, and revised the manuscript, and gave final approval for the publication of this study protocol.  
53  
54  
55  
56  
57  
58  
59  
60

### Funding

This work was financially supported by the National Natural Science Foundation of China (no. 81590951, no. 81722050).

### Competing interests

The authors declare that they have no competing interests.

### Ethics approval

The study protocol has been approved by the institutional review board and ethics committee of the First Affiliated Hospital of Chengdu University of Traditional Chinese Medicine (May 2018).

### Provenance and peer review

Not commissioned; internally peer reviewed.

### Open Access

This is an Open Access article distributed in accordance with the Creative Commons Attribution Non Commercial (CCBY-NC 3.0) license, which permits others to distribute, remix, adapt, build upon this work noncommercially, and license their derivative works on different terms, provided the original work is properly cited and the use is non-commercial. See: <http://creativecommons.org/licenses/by-nc/3.0/>

### REFERENCES

1. Sarikouzel H, Cooper R. Managing pain from cervical spondylosis. *Practitioner* 1999;243(1597):334-8.
2. Bogduk N, Lord SM. Cervical spine disorders. *Curr Opin Rheumatol* 1998;10(2):110-5.
3. Hoggjohnson S, Velde GVD, Carroll LJ, et al. The burden and determinants of neck pain in the general population: Results of the bone and joint decade 2000–2010 Task force on neck pain and its associated disorders. Best evidence on the burden and determinants of neck. *Eur Spine J* 2008;17(1):39-51.
4. Wang B, Duan YP, Zhang YC, et al. [Epidemiologic research on the clinical features of patients with cervical spondylosis]. *Journal of Central South University. Medical sciences* 2004;29(4):472.



- 1
- 2
- 3 5. Collaborators UBOD. The State of US Health, 1990-2010: Burden of Diseases,
- 4 Injuries, and Risk Factors. *JAMA* 2013;310(6):591-608.
- 5 6. Hoy D, March L, Woolf A, et al. The global burden of neck pain: estimates from the
- 6 global burden of disease 2010 study. *Ann Rheum Dis* 2014;73(6):968.
- 7 7. White AR, Ernst E. A systematic review of randomized controlled trials of acupuncture
- 8 for neck pain. *Rheumatology (Oxford, England)* 1999;38(2):143-7.
- 9 8. Borghouts JAJ, Koes BW, Vondeling H, et al. Cost-of-illness of neck pain in The
- 10 Netherlands in 1996. *Pain* 1999;80(3):629-36.
- 11 9. Berman BM, Swyers JP. Establishing a research agenda for investigating alternative
- 12 medical interventions for chronic pain. *Primary care* 1997;24(4):743-58.
- 13 10. Witt CM, Jena S, Brinkhaus B, et al. Acupuncture for patients with chronic neck pain.
- 14 *Pain* 2006;125(1-2):98-106.
- 15 11. White AR, Ernst E. A systematic review of randomized controlled trials of acupuncture
- 16 for neck pain. *Rheumatology* 1999;38(2):143-7.
- 17 12. Irnich D, Behrens N, Gleditsch JM, et al. Immediate effects of dry needling and
- 18 acupuncture at distant points in chronic neck pain: results of a randomized, double-blind,
- 19 sham-controlled crossover trial. *Pain* 2002;99(1-2):83-9.
- 20 13. Cerezo-Téllez E, Torres-Lacomba M, Fuentes-Gallardo I, et al. Effectiveness of dry
- 21 needling for chronic nonspecific neck pain: a randomized, single-blinded, clinical trial.
- 22 *Pain* 2016;157(9):1905-17.
- 23 14. Madsen MV, Gøtzsche PC, Hróbjartsson A. Acupuncture treatment for pain:
- 24 systematic review of randomised clinical trials with acupuncture, placebo acupuncture,
- 25 and no acupuncture groups. *BMJ* 2009;338(7690):330-3.
- 26 15. Pilkington K. Evidence on Acupuncture and Pain: Reporting on a Work in Progress. *J*
- 27 *Acupunct Meridian Stud* 2015;8(5):217-9.
- 28 16. Basiouni A. Acupuncture versus placebo for the treatment of chronic mechanical neck
- 29 pain: a randomized, controlled trial. *Annals of internal medicine* 2004;141(12):911.
- 30 17. Irnich D, Behrens N, Gleditsch JM, et al. Immediate effects of dry needling and
- 31 acupuncture at distant points in chronic neck pain: results of a randomized, double-blind,
- 32 sham-controlled crossover trial. *Pain* 2002;99(1):83-9.
- 33 18. Vas J, Perea-Milla E, Méndez C, et al. Efficacy and safety of acupuncture for chronic
- 34 uncomplicated neck pain: A randomised controlled study ☆. *Pain* 2006;126(1):245-55.
- 35 19. Ho LF, Lin ZX, Leung AWN, et al. Efficacy of abdominal acupuncture for neck pain: A
- 36 randomized controlled trial. *Plos One* 2017;12(7):e0181360.
- 37 20. Yang Y, Yan X, Deng H, et al. The efficacy of traditional acupuncture on patients with
- 38 chronic neck pain: study protocol of a randomized controlled trial. *Trials* 2017;18(1):312.
- 39 21. Persson AL, Brogårdh C, Sjölund BH. Tender or not tender: test-retest repeatability of
- 40 pressure pain thresholds in the trapezius and deltoid muscles of healthy women. *Journal*
- 41 *of rehabilitation medicine* 2004;36(1):17.
- 42 22. Fischer AA. Pressure algometry over normal muscles. Standard values, validity and
- 43 reproducibility of pressure threshold. *Pain* 1987;30(1):115-26.
- 44 23. Chen S, Miao Y, Nan Y, et al. The Study of Dynamic Characteristic of Acupoints
- 45 Based on the Primary Dysmenorrhea Patients with the Tenderness Reflection on Dijī (SP
- 46 8). *eCAM* 2015,(2015-6-16). 2015;2015:158012.
- 47
- 48
- 49
- 50
- 51
- 52
- 53
- 54
- 55
- 56
- 57
- 58
- 59
- 60

24. Chae Y, Kim HY, Lee HJ, et al. The alteration of pain sensitivity at disease-specific acupuncture points in premenstrual syndrome. *Journal of Physiological Sciences* 2007;57(2):115.
25. Yan CQ, Zhang S, Li QQ, et al. Detection of peripheral and central sensitisation at acupoints in patients with unilateral shoulder pain in Beijing: a cross-sectional matched case-control study. *BMJ open* 2017;7(6):e014438.
26. Tunks E, Crook J, Norman G, et al. Tender points in fibromyalgia. *Pain* 1988;34(1):11.
27. Zhang CR, Xiao HH, Chen RX. Observation on curative effect of moxibusting on heat-sensitive points on pressure sores. *J Tradit Complement Med* 2010.
28. Chen RX, Kang MF. Acupoint heat-sensitization and its clinical significance. *Journal of Traditional Chinese Medicine* 2006;2001(4):488-9.
29. Schulz KF, Altman DG, Moher D. CONSORT 2010 Statement: updated guidelines for reporting parallel group randomised trials. *Bmj* 2010;340(7748):698-702.
30. Hugh MP, Altman DG, Richard H, et al. Revised STandards for Reporting Interventions in Clinical Trials of Acupuncture (STRICTA): Extending the CONSORT Statement. *J Evid Based Med* 2010;3(3):35-46.
31. Shahidi B, Maluf KS. Adaptations in Evoked Pain Sensitivity and Conditioned Pain Modulation after Development of Chronic Neck Pain. *Biomed Res Int* 2017;2017(3, supplement):1-6.
32. Nijs J, Kosek E, Van OJ, et al. Dysfunctional endogenous analgesia during exercise in patients with chronic pain: to exercise or not to exercise? *Pain physician* 2012;15(3 Suppl):ES205.
33. Johnston V, Jull G, Darnell R, et al. Alterations in cervical muscle activity in functional and stressful tasks in female office workers with neck pain. *Eur J Appl Physiol* 2008;103(3):253-64.
34. Olson SL, O'Connor DP, Birmingham G, et al. Tender point sensitivity, range of motion, and perceived disability in subjects with neck pain. *J Orthop Sports Phys Ther* 2000;30(1):13.
35. Zhao L, Chen J, Li Y, et al. The Long-term Effect of Acupuncture for Migraine Prophylaxis: A Randomized Clinical Trial. *JAMA Intern Med* 2017;177(4):508-15.
36. Melchart D, Streng A, Hoppe A, Brinkhaus B, Witt C, Wagenpfeil S, et al. Acupuncture in patients with tension-type headache: randomised controlled trial. *BMJ* 2005;331(7513):376-82.
37. Saltychev M, Mattie R, McCormick Z, Laimi K. Psychometric properties of the neck disability index amongst patients with chronic neck pain using item response theory. *Disabil Rehabil* 2017:1-6.
38. Laurent B. [Chronic pain: emotional and cognitive consequences]. *Bull Acad Natl Med* 2015;199(4-5):543.
39. Maletic V, Raison CL. Neurobiology of depression, fibromyalgia and neuropathic pain. *Front Biosci* 2009;14(6):5291.
40. Ling Z, Zhang FW, Ying L, et al. Adverse events associated with acupuncture: three multicentre randomized controlled trials of 1968 cases in China. *Trials* 2011;12(1):1-9.
41. Luo YN, Zhou YM, Zhong X, et al. Observation of Pain-Sensitive Points in Patients with Knee Osteoarthritis: A Pilot Study. *Eur J Integr Med*. 2018.

1  
2  
3 42. Prevention (CDC). Vital signs: overdoses of prescription opioid pain relievers---United  
4 States, 1999--2008.[J]. *Morbidity & Mortality Weekly Report* 2011, 60(43):1487-1492.

5 43. Han B, Compton WM, Blanco C, et al. Prescription Opioid Use, Misuse, and Use  
6 Disorders in U.S. Adults: 2015 National Survey on Drug Use and Health. *Ann Intern Med*  
7 2017;167(5):293.

8 44. Andersson S, Lundeberg T. Acupuncture--from empiricism to science: functional  
9 background to acupuncture effects in pain and disease. *Med Hypotheses* 1995;45(3):271.

10 45. Ronaldson S, Adamson J, Dyson L, et al. Waiting list randomized controlled trial  
11 within a case - finding design: methodological considerations. *J Eval Clin Prac*  
12 2015;20(5):601-5.

13 46. Ainsworth HR, Kang'Ombe AR. Conceptual, Design, and Statistical Complications  
14 Associated with Participant Preference. *Ann Am Acad Pol Soc Sci* 2010;628(1):176-88.

15  
16  
17  
18  
19  
20 **Figure 1** Flowchart of the trial design.

21  
22  
23  
24 **Figure 2** The test regions that will be used in the study. Regions 1 and 2 are each bordered by the  
25 respective ipsilateral mastoid, sternal end of the clavicle, anterior axillary line, acromion, and C7  
26 spinous process. Region 3 is the triangular region bordered by both sides of the mastoid and the  
27 C7 spinous process. Regions 4 and 5 are each bordered by the respective ipsilateral C7 spinous  
28 process, acromion, and axillary line; the two regions are divided by the posterior midline.

29  
30  
31  
32 **Figure 3** Locations of the five non-acupoints used in the study.

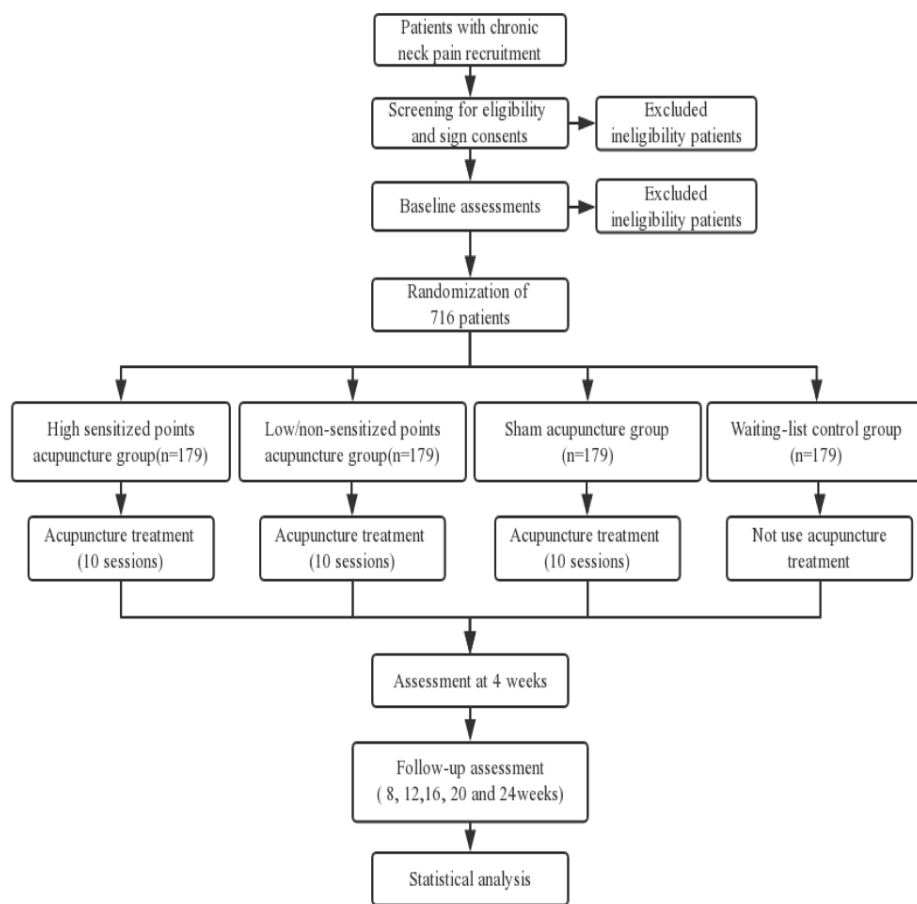

Figure 1 Flowchart of the trial design.

90x90mm (300 x 300 DPI)

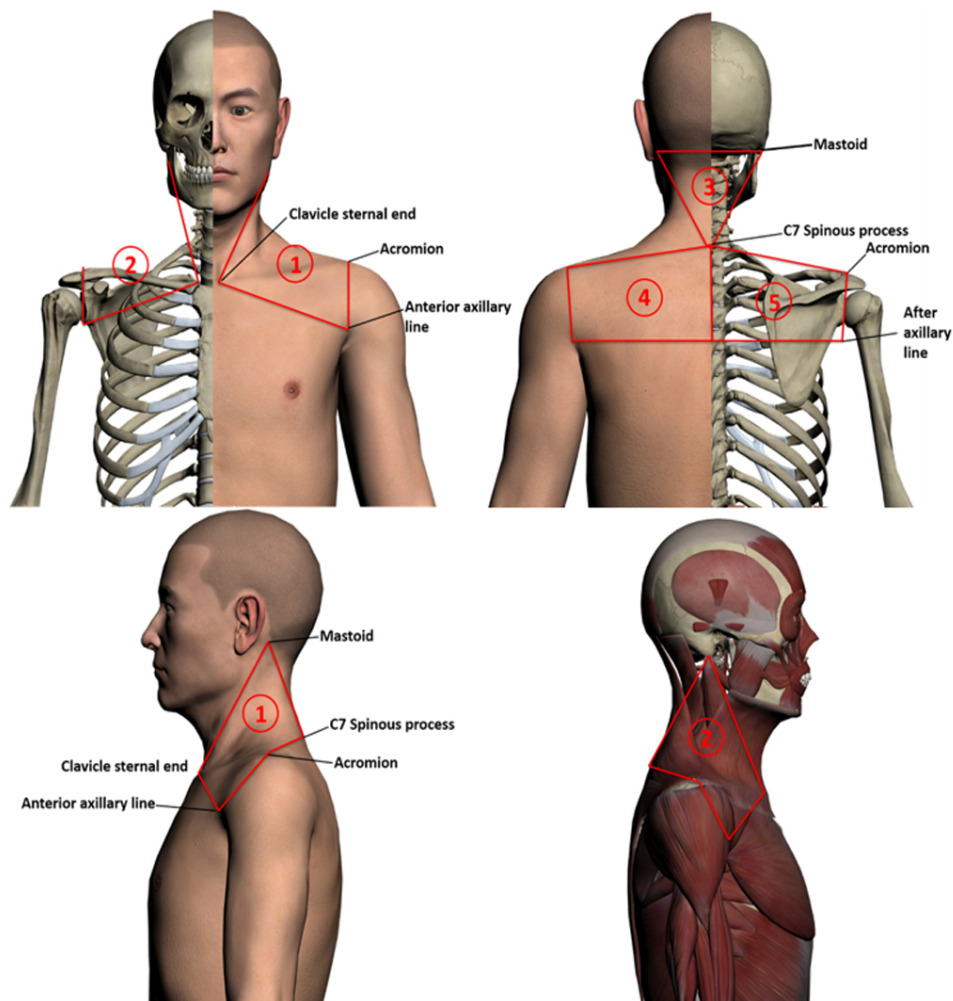

Figure 2 The test regions that will be used in the study. Regions 1 and 2 are each bordered by the respective ipsilateral mastoid, sternal end of the clavicle, anterior axillary line, acromion, and C7 spinous process. Region 3 is the triangular region bordered by both sides of the mastoid and the C7 spinous process. Regions 4 and 5 are each bordered by the respective ipsilateral C7 spinous process, acromion, and axillary line; the two regions are divided by the posterior midline.

90x90mm (300 x 300 DPI)

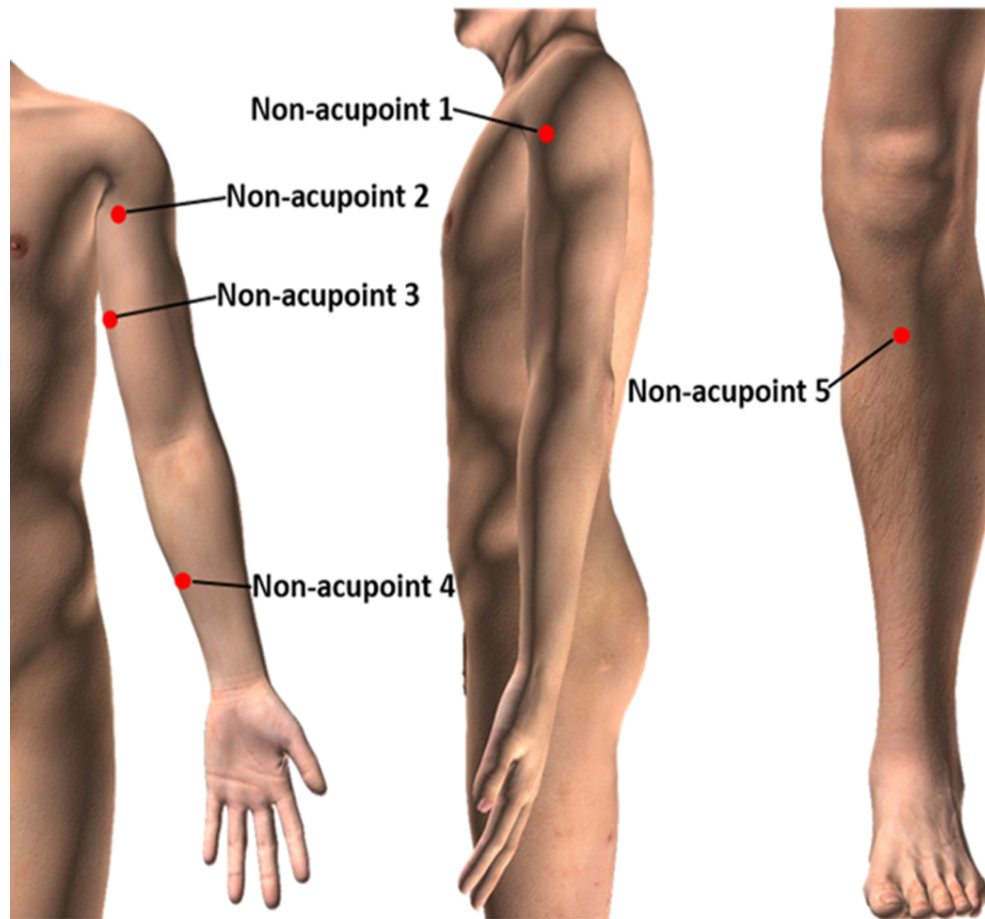

Figure 3 Locations of the five non-acupoints used in the study.

90x90mm (300 x 300 DPI)

Appendix Table

| Regions           | Acupoints             | Pressure pain threshold of healthy subjects (gf) |
|-------------------|-----------------------|--------------------------------------------------|
| Region 1          | Jianjing (GB-21) L    | 2234                                             |
|                   | Jianzhongshu(SI-15) L | 2648                                             |
| Region 2          | Jianjing (GB-21) R    | 2222                                             |
|                   | Jianzhongshu(SI-15) R | 2650                                             |
| Region 3          | Wangu(GB-12) L        | 1616                                             |
|                   | Fengchi(GB-20) L      | 1909                                             |
|                   | Tianzhu(BL-10) L      | 2067                                             |
|                   | Dazhui(DU-14)         | 2978                                             |
|                   | Wangu(GB-12) R        | 1738                                             |
|                   | Fengchi(GB-20) R      | 2037                                             |
|                   | Tianzhu(BL-10) R      | 2083                                             |
| Region 4          | Dazhu(BL-11) L        | 2924                                             |
|                   | Jianwaishu(SI-14) L   | 2856                                             |
|                   | Tianliao(SJ-15) L     | 2788                                             |
|                   | Jugu(LI-16) L         | 2611                                             |
|                   | Tianzong(SI-11) L     | 2484                                             |
| Region 5          | Dazhu(BL-11) R        | 2932                                             |
|                   | Jianwaishu(SI-14) R   | 2849                                             |
|                   | Tianliao(SJ-15) R     | 3075                                             |
|                   | Jugu(LI-16) R         | 2652                                             |
|                   | Tianzong(SI-11) R     | 2478                                             |
| Distant acupoints | Shousanli(LI-10) L    | 1645                                             |
|                   | Lieque(LU-7) L        | 2003                                             |
|                   | Zhongzhu(SJ-3) L      | 2011                                             |
|                   | Houxi(SI-3) L         | 2326                                             |
|                   | Shousanli(LI-10) R    | 1710                                             |
|                   | Lieque(LU-7) R        | 2192                                             |
|                   | Zhongzhu(SJ-3) R      | 2017                                             |
| Houxi(SI-3) R     | 2419                  |                                                  |

L:  
left;  
R:  
right



# BMJ Open

## Acupuncture for chronic neck pain with sensitive points: study protocol for a multicenter randomized controlled trial

|                                 |                                                                                                                                                                                                                                                                                                                                                                                                                                                                                                                                                                                                                                                                                                                                                                                                                                                                                                                                                                                                                                                                                                                                                             |
|---------------------------------|-------------------------------------------------------------------------------------------------------------------------------------------------------------------------------------------------------------------------------------------------------------------------------------------------------------------------------------------------------------------------------------------------------------------------------------------------------------------------------------------------------------------------------------------------------------------------------------------------------------------------------------------------------------------------------------------------------------------------------------------------------------------------------------------------------------------------------------------------------------------------------------------------------------------------------------------------------------------------------------------------------------------------------------------------------------------------------------------------------------------------------------------------------------|
| Journal:                        | <i>BMJ Open</i>                                                                                                                                                                                                                                                                                                                                                                                                                                                                                                                                                                                                                                                                                                                                                                                                                                                                                                                                                                                                                                                                                                                                             |
| Manuscript ID                   | bmjopen-2018-026904.R1                                                                                                                                                                                                                                                                                                                                                                                                                                                                                                                                                                                                                                                                                                                                                                                                                                                                                                                                                                                                                                                                                                                                      |
| Article Type:                   | Protocol                                                                                                                                                                                                                                                                                                                                                                                                                                                                                                                                                                                                                                                                                                                                                                                                                                                                                                                                                                                                                                                                                                                                                    |
| Date Submitted by the Author:   | 12-Mar-2019                                                                                                                                                                                                                                                                                                                                                                                                                                                                                                                                                                                                                                                                                                                                                                                                                                                                                                                                                                                                                                                                                                                                                 |
| Complete List of Authors:       | Sun, Mingsheng; Chengdu University of Traditional Chinese Medicine, College of Acupuncture and Tuina<br>Geng, Guoyan; Chengdu University of Traditional Chinese Medicine, College of Acupuncture and Tuina<br>Chen, Jiao; Chengdu University of Traditional Chinese Medicine, College of Acupuncture and Tuina<br>Ma, Xingsha; Chengdu University of Traditional Chinese Medicine, College of Acupuncture and Tuina<br>Yan, Mingxi; Chengdu University of Traditional Chinese Medicine, College of Acupuncture and Tuina<br>Liu, Xiaojia; Chengdu University of Traditional Chinese Medicine, College of Acupuncture and Tuina<br>Du, Jiarong; Chengdu University of Traditional Chinese Medicine, College of Acupuncture and Tuina<br>Cai, Dingjun; Chengdu University of Traditional Chinese Medicine, College of Acupuncture and Tuina<br>Zheng, Hui ; Chengdu University of Traditional Chinese Medicine, College of Acupuncture and Tuina<br>Zhao, Ling; Chengdu University of Traditional Chinese Medicine, College of Acupuncture and Tuina<br>Liang, Fan-rong; Chengdu University of Traditional Chinese Medicine, College of Acupuncture and Tuina |
| <b>Primary Subject Heading</b>: | Complementary medicine                                                                                                                                                                                                                                                                                                                                                                                                                                                                                                                                                                                                                                                                                                                                                                                                                                                                                                                                                                                                                                                                                                                                      |
| Secondary Subject Heading:      | Complementary medicine                                                                                                                                                                                                                                                                                                                                                                                                                                                                                                                                                                                                                                                                                                                                                                                                                                                                                                                                                                                                                                                                                                                                      |
| Keywords:                       | acupuncture, sensitized points, chronic neck pain, study protocol, pressure pain threshold                                                                                                                                                                                                                                                                                                                                                                                                                                                                                                                                                                                                                                                                                                                                                                                                                                                                                                                                                                                                                                                                  |
|                                 |                                                                                                                                                                                                                                                                                                                                                                                                                                                                                                                                                                                                                                                                                                                                                                                                                                                                                                                                                                                                                                                                                                                                                             |

SCHOLARONE™  
Manuscripts



1  
2  
3  
4 **Acupuncture for chronic neck pain with sensitive points: study protocol for a**  
5 **multicenter randomized controlled trial**  
6  
7  
8

9 Ming-Sheng Sun<sup>†</sup>, Guo-Yan Geng<sup>†</sup>, Jiao Chen<sup>†</sup>, Xing-Sha Ma, Ming-Xi Yan, Xiao-Jia Liu, Jia-  
10 Rong Du, Ding-Jun Cai, Hui Zheng, Ling Zhao\*, Fan-Rong Liang\*  
11  
12  
13

14  
15 <sup>†</sup>Mingsheng Sun, Guoyan Geng, and Jiao Chen contributed equally to this work.  
16  
17

18  
19 College of Acupuncture and Tuina, Chengdu University of Traditional Chinese Medicine, Chengdu,  
20 610075, China  
21  
22

23  
24  
25 **\*Corresponding authors**  
26

27 Professor Ling Zhao

28  
29 Postal address: 37 Shierqiao Road, Chengdu, Sichuan, China

30  
31 Telephone: +86 13568801429

32  
33 Email: [ling94@163.com](mailto:ling94@163.com)  
34  
35

36  
37 Professor Fan-Rong Liang

38  
39 Postal address: 37 Shierqiao Road, Chengdu, Sichuan, China

40  
41 Telephone: +86 13608058216

42  
43 Email: [acuresearch@126.com](mailto:acuresearch@126.com)  
44  
45

46 **Word count:**

47  
48 3,075 words  
49  
50

51  
52 **Keywords:**

53  
54 acupuncture, sensitive points, chronic neck pain, study protocol, pressure pain threshold  
55  
56  
57  
58  
59  
60

## ABSTRACT

**Introduction:** Chronic neck pain is a challenging condition to treat in clinical practice, and has a considerable impact on quality of life and disability. According to the theory of traditional Chinese medicine, acupoints and tender points may become sensitized when the body is in a diseased state; stimulation of such sensitive points may lead to disease improvement and improved clinical efficacy. This study aims to evaluate the efficacy and safety of needling at sensitive acupoints in providing pain relief, improvement of cervical vertebral function, and quality of life in patients with chronic neck pain.

**Methods and analysis:** This multicenter, randomized controlled, explanatory, and parallel clinical trial will include 716 patients with chronic neck pain. Study participants will be randomly assigned in a 1:1:1:1 ratio to four treatment groups: the highly-sensitive acupoints group, low/non-sensitive acupoints group, sham acupuncture group, and waiting-list control group. The primary outcome will be the change in the visual analogue scale score for neck pain from baseline to 4 weeks. Secondary outcomes will be the Northwick Park Neck Pain Questionnaire and McGill pain questionnaire, 12-item Short-Form health survey, Neck Disability Index, changes in the pressure pain threshold, range of cervical motion, Self-Rating Anxiety Scale, Self-Rating Depression Scale, and adverse events before treatment, post-treatment, and at 4, 8, 12, 16, and 20 weeks post-treatment. The intention-to-treat approach will be used in the statistical analysis. Group comparisons will be undertaken using  $\chi^2$  tests for categorical characteristics, and analysis of variance for continuous variables to analyze whether acupuncture in the highly-sensitive acupoints group achieves better treatment outcomes than in each of the other three groups.

**Ethics and dissemination:** Ethical approval of this study has been granted by the local Institutional Review Board (ID: 2017KL-038). The outcomes of the trial will be disseminated through peer-reviewed publications.

**Trial registration:** ChiCTR1800016371.

### Strengths and limitations of this study

- ▶ This study will be the first randomized controlled trial to evaluate the efficacy and safety of acupuncture at sensitive points in patients with chronic neck pain.
- ▶ To test the efficacy of acupuncture at sensitive acupoints, the trial will include three kinds of

control groups (low/non-sensitive acupoints acupuncture group, sham acupuncture group, and waiting-list control group), and strict quality control will be conducted, including adequate concealment of randomized group allocations.

► A sham acupuncture group will be used to investigate the placebo effect of acupuncture.

► A limitation of this trial is that although there are several types of point sensitization, such as pain and heat, we will only be quantifying pain as an indicator of sensitization.

## INTRODUCTION

Chronic neck pain can be caused by dysfunction of various structures in the neck, and can manifest as episodic pain and/or stiffness.[1 2] The prevalence of neck pain in the adult general population reportedly varies from 30–50% worldwide.[3] Furthermore, neck pain-related diseases, such as cervical spondylosis, occur in 65% of subjects working in certain occupations in China.[4] Neck pain is the third most common chronic condition causing persistent pain in the US, and the fourth leading cause of disability worldwide.[5 6] Chronic neck pain can lead to work absenteeism or a heavy medical burden.[7] The mean annual total costs accrued by patients with neck pain in the USA are \$8,512, which is 182% higher than the costs of the general population.[8] Several risk factors predispose to the development of chronic neck pain, including obesity, a sedentary lifestyle, previous neck pain, cervical disc degeneration, and poor general health. The current mainstay of treatment for chronic neck pain is non-steroidal anti-inflammatory drugs, but they are associated with many adverse reactions, such as gastrointestinal, cardiac, and renal toxicity.[9]

Although clinical trials have suggested that acupuncture can effectively relieve chronic neck pain,[10] the effect of acupuncture treatment is closely related to the selection of acupoints.[11] One study evaluating the effects of acupuncture on chronic neck pain showed that acupuncture at common distant acupoints is more effective than that at myofascial trigger points,[12] while another study found that acupuncture at local myofascial trigger points also has a good analgesic effect.[13] However, some studies have also reported that acupuncture does not relieve pain.[14-16] Despite the increasing amount of randomized clinical trials (RCTs) investigating the effect of acupuncture, the quality of these RCTs needs to be improved, as many include inadequate sample sizes,[17] short follow-up,[18] an absence of sham acupuncture and non-treatment as control treatments,[19] no objective assessment method,[20] or a lack of individualized treatment based on each patient's

1  
2  
3  
4 condition.[21] Consequently, the efficacy of acupuncture for chronic neck pain needs further  
5  
6 evaluating due to the lack of objective clinical evidence.

7  
8 The pressure pain threshold (PPT) is a semi-objective method used to quantify localized pain.[22  
9  
10 23] Clinical studies have confirmed that the sensitivity (PPT) at acupoints changes when patients  
11  
12 are in a diseased state, such as shoulder pain,[24] knee osteoarthritis,[25] primary dysmenorrhea,  
13  
14 [26] and premenstrual syndrome.[27] The degree of change in the PPT may objectively reflect the  
15  
16 intensity of acupoint sensitization, and may be related to the disease status.[28] Clinical studies have  
17  
18 found that performing acupuncture at sensitive points achieves a superior effect.[29 30] However,  
19  
20 these studies did not quantify the sensitivity of the points, which undermines the validity of the  
21  
22 results. Consequently, the improvement in clinical efficacy may not have been optimized. Clinical  
23  
24 trials have recently investigated the efficacy of acupuncture at objectively evaluated sensitive  
25  
26 points.[31] This will further reveal the relationship between objectively evaluated sensitive points  
27  
28 and improved clinical efficacy. However, no study has yet focused on the efficacy of acupuncture  
29  
30 at quantified sensitive points for the treatment of chronic neck pain. Therefore, we herein describe  
31  
32 the protocol for an RCT that aims to evaluate the efficacy of acupuncture at sensitive points  
33  
34 (acupoints or tender points) in relieving neck pain and improving cervical vertebral function and  
35  
36 quality of life.

## 37 38 **METHODS AND ANALYSIS**

### 39 40 **Objective**

41  
42 To assess the efficacy and safety of acupuncture at highly-sensitive acupoints in relieving pain and  
43  
44 improving the cervical vertebral function and quality of life in patients with chronic neck pain.

### 45 46 47 48 **Trial design**

49  
50 This is a prospective, multicenter RCT in which patients will be allocated to four parallel treatment  
51  
52 groups using a 1:1:1:1 allocation ratio. The protocol was developed in accordance with the  
53  
54 Consolidated Standards of Reporting Trials guidelines[32] and the Standards for Reporting  
55  
56 Interventions in Clinical Trials of Acupuncture guidelines.[33] The trial has been registered with  
57  
58 ChiCTR at Current Controlled Trials (ChiCTR1800016371). A flowchart of the trial design is  
59  
60 shown in Figure 1.

### **Inclusion criteria**

The inclusion criteria will be: (1) males or females aged 18–75 years; (2) neck pain or limited cervical activity as the main complaint; (3) neck pain or discomfort visual analogue scale (VAS) score of  $\geq 30$  for at least 5 days within 1 week; (4) chronic neck pain for the last 3 months; (5) provision of written informed consent for all procedures in this trial.

### **Exclusion criteria**

Patients meeting any one of the following criteria will be excluded: (1) history of neck fracture or surgery, or cervical congenital abnormality; (2) serious disease related to the heart, liver, kidney, or hematopoietic system; (3) difficulty in answering the questionnaires because of cognitive impairment; (4) dermatopathy and hemorrhagic diseases; (5) those who are pregnant, breastfeeding, or planning a pregnancy during the study period; (6) participation in other trials.

### **Recruitment strategies and randomization**

We will enroll patients from the outpatient departments of Acupuncture and Moxibustion, and Orthopedics in four clinical centers in China: Chengdu University of Traditional Chinese Medicine, Shaanxi University of Traditional Chinese Medicine, Shanxi University of Traditional Chinese Medicine, and Guiyang College of Traditional Chinese Medicine. Recruitment strategies will include posting recruitment advertisements on social media (such as WeChat, which is similar to Facebook) and at community centers. Patients who consent to study participation will be examined by orthopedists who will make a diagnosis; a research assistant (RA) will then perform a baseline evaluation. The RA will apply for the grouping randomization after completing the PPT measurement.

Central randomization will be performed using stratified and permuted blocks. The RAs will be registered in the randomization center (located in Brightech-Magnsoft Data Services Company), and will be trained to apply for randomization through the online website. This guarantees that randomization concealment is adequate. Patients will be randomized in blocks of varying size within each site, stratified by sex and course of disease.

## Blinding

The RA will be responsible for baseline evaluation, PPT measurement, and randomization. The acupuncture treatments will be performed by acupuncturists who have each held a practitioners license for more than 5 years. The efficacy of acupuncture will be evaluated by an assessor. Patients who receive acupuncture treatment will not be aware of their group assignment; however, the waiting-list control group cannot be blinded. The patients receiving acupuncture treatment during the trial period, RA who performs the baseline assessment, acupuncturists, assessors, and statisticians will all be blinded.

## PPT measurement

The PPT is widely used in clinical practice as a semi-objective method with which to quantify localized pain.[22 23] Individuals with chronic neck pain have altered pain sensitivity,[34-36] and so the PPT can be used to distinguish between patients with neck pain and healthy subjects.[37] In accordance with the results of literature data-mining and expert consensus on the treatment of chronic neck pain, we identified the 15 most frequently used acupoints (Table 1) and the five regions of the body with the most frequent occurrence of pain and the greatest degree of acupoint sensitization (Figure 2). The body was divided into five regions to standardize the treatment procedures and detection areas.

RAs will mark the 15 acupoints on each patient. The RA will then palpate the detection area associated with each acupoint using the appropriate force (< 2,000 gf), and will identify the sensitive points that have pain/sourness/heaviness/fullness or nodules. RAs will use the FDIX Force Gauge (Force One™ FDIX, Wagner Instruments, USA) to make two measurements of the PPT at each of the 15 acupoints in the five regions. If there is a difference between the two PPT measurements of more than 500 gf at one acupoint, the acupoint will be measured for the third time. Progressive pressure will be applied at a rate of 100 gf/s at each acupoint. The PPTs will be summed to calculate the average. The absolute value of the change in the PPT in the included patients will then be calculated, and this will be compared with that of healthy subjects collected in the early stage (Appendix Table).

### Table 1 Acupoints selected for use in the study

| Acupoints           | Location                                                                                                                                                                   |
|---------------------|----------------------------------------------------------------------------------------------------------------------------------------------------------------------------|
| Jianjing (GB-21)    | On the shoulder, directly above the nipple, at the midpoint of the line connecting Dazhui(DU-14) with the acromial end of clavicle                                         |
| Jianzhongshu(SI-15) | On the back, 2 cun lateral to the lower border of the spinous process of the 7 <sup>th</sup> cervical vertebra                                                             |
| Wangu(GB-12)        | On the head, in the depression posterior and inferior to the mastoid process.                                                                                              |
| Fengchi(GB-20)      | On the nape, below the occipital, on a level with Fengfu DU-16, in the depression between the upper portion of trapezius and the sternocleidomastoid                       |
| Tianzhu(BL-10)      | On the nape, 1.3 cun lateral to the posterior hairline, in the depression of the posterior hairline lateral to the trapezius muscle                                        |
| Dazhui(DU-14)       | On the posterior median line, in the depression below the spinous process of the 7 <sup>th</sup> cervical vertebra                                                         |
| Dazhu(BL-11)        | On the back, 1.5 cun lateral to the lower border of the spinous process of the 1 <sup>st</sup> thoracic vertebra                                                           |
| Jianwaishu(SI-14)   | On the back, 3 cun lateral to the lower border of the spinous process of the first thoracic vertebra                                                                       |
| Tianliao(SJ-15)     | On the region of scapula, at the midpoint of the line connecting Jianjing GB-21 with Quyuan SI-13, on the superior angle of the scapula                                    |
| Jugu(LI-16)         | In the upper portion of the shoulder, in the depression between the acromial end of clavicle and the scapular spine                                                        |
| Tianzong(SI-11)     | In the region of the scapula, in the depression of the center of the subscapular fossa, on a level with the 4 <sup>th</sup> thoracic vertebra                              |
| Shousanli(LI-10)    | Flexing the elbow, on the dorsal radial side of the forearm, on the line connecting Yangxi LI-5 with Quchi LI-11, 2cun below the transverse cubital crease                 |
| Lieque(LU-7)        | On the radial margin of the forearm, 1.5 cun above the transverse crease of the wrist, between the branchioradial muscle and the long abductor muscle tendon of thumb      |
| Zhongzhu(SJ-3)      | On the dorsum of the hand, in the depression between the 4 <sup>th</sup> and 5 <sup>th</sup> metacarpal bones, proximal to the 4 <sup>th</sup> metacarpalangeal joint      |
| Houxi(SI-3)         | On the ulna side of the palm, proximate to the fifth metacarpophalangeal joint, at the end of transverse crease of metacarpophalangeal joint, at the dorsoventral boundary |

### Interventions

#### 1) Highly-sensitive acupoints group

The acupuncturist will identify the five sensitive points/acupoints at which the absolute value of change in the PPT is the largest. Acupuncture will be performed at these five acupoints three times weekly for the first 2 weeks, and then two times weekly for the subsequent 2 weeks, giving a total

of 10 sessions. Each of the five selected acupoints will be punctured using a stainless steel needle (0.25 × 40 mm), and the Deqi sensation (a sensation of distension or numbness, or a twitch response) will be achieved. Needle retention time will be 30 min. The PPT of the sensitive acupoints will be evaluated every 2 weeks, and the selection of acupuncture points will be adjusted as each patient's condition changes; this will ensure the implementation of individualized treatment.

#### 2) Low/non-sensitive acupoints group

The acupuncturist will identify the five sensitive acupoints with the least change in the absolute value of the PPT, and acupuncture will be performed at these five acupoints. The puncture method and needles will be the same as for the highly-sensitive acupoints group.

#### 3) Sham acupuncture group

Acupuncture will be performed at five non-acupoints. The protocol for choosing the non-acupoints was developed in our previous clinical trial[38] and another study[39] (Table 2 and Figure 3). Shallow acupuncture will be applied at the five non-acupoints, without attempting to yield the Deqi sensation.

**Table 2** Details of the intervention in the sham acupuncture group

| Non-acupoint          | Location                                                                                                                      | Manipulation                           |
|-----------------------|-------------------------------------------------------------------------------------------------------------------------------|----------------------------------------|
| <b>Non-acupoint 1</b> | In the middle of Binao(LI 14) and acromion                                                                                    | punctured perpendicularly<br>0.5–1 cun |
| <b>Non-acupoint 2</b> | At the medial arm on the anterior border of the insertion of the deltoid muscle at the junction of deltoid and biceps muscles |                                        |
| <b>Non-acupoint 3</b> | Half way between the tip of the elbow and axillae                                                                             |                                        |
| <b>Non-acupoint 4</b> | Ulnar side, half way between the epicondylus medialis of the humerus and ulnar side of the wrist                              |                                        |
| <b>Non-acupoint 5</b> | Edge of the tibia 1–2 cm lateral to the Zusanli (ST36) horizontally                                                           |                                        |

#### 4) Waiting-list control group



1  
2  
3  
4 No intervention will be performed in the waiting-list control group in the initial 24 weeks after  
5 randomization. The participants will be informed that they are scheduled to receive 10 free  
6 acupuncture treatments at the end of the 24-week follow-up period.  
7  
8

9  
10  
11 If any participants experience severe neck pain during the initial 24 weeks, they will be permitted  
12 to take prescribed analgesic medications (such as non-steroidal anti-inflammatory drugs) or  
13 effective analgesic medications that they are accustomed to taking, and the details will be recorded  
14 on the Case Report Form. Sustained-release or prophylactic analgesics are not allowed.  
15  
16  
17  
18

### 19 20 21 **Outcome measurements**

22  
23 Follow-up examinations will be performed at 0, 4, 8, 12, 16, 20, and 24 weeks after randomization  
24 in all four groups (Table 3).  
25  
26  
27  
28

### 29 **Primary outcome**

30  
31 The primary outcome will be the change in the VAS score for neck pain from baseline to 4 weeks.  
32  
33 The VAS score ranges from 0–100, with higher scores indicating a greater degree of pain. The VAS  
34 is considered a valid method with which to assess pain intensity in clinical trials.[40] The strengths  
35 of the VAS are its ease of use, good reliability and validity, and metric measure that enables  
36 parametric testing. However, its limitation is that it is difficult for some subjects to mentally  
37 transform a subjective sensation into a mark on a straight line. Furthermore, previous research has  
38 suggested that the validity of VAS estimates performed by patients with chronic pain may be  
39 unsatisfactory.[41]  
40  
41  
42  
43  
44  
45  
46  
47

### 48 **Secondary outcomes**

#### 49 **Pain**

50  
51 We will also use the following indicators to comprehensively evaluate pain. The intensity of neck  
52 pain will be measured using the Northwick Park Neck Pain Questionnaire and the McGill Pain  
53 Questionnaire. The changes in the PPT during the treatment phase will be evaluated. The times and  
54 doses of analgesic drugs taken during the study period, and the disease-related treatment performed  
55 during the follow-up period will also be recorded.  
56  
57  
58  
59  
60

### Quality of life

Quality of life will be assessed using the Chinese version of the Medical Outcome Study Short-form 12-Item Health Survey.

### Neck function

The change in neck function will be evaluated using the Neck Disability Index and the cervical range of motion. Recent research has shown that the Neck Disability Index has an excellent ability to distinguish between patients with different levels of perceived dysfunction.[42]

### Emotional disorders

Chronic pain is often accompanied by emotional disorders.[43 44] Changes in mood will be assessed using the Self-Rating Anxiety Scale and the Self-Rating Depression Scale.

**Table 3** Outcome measurements at each timepoint

| Measurements                            | Baseline | Treatment phase |         |         | Follow-up phase |          |          |          |          |
|-----------------------------------------|----------|-----------------|---------|---------|-----------------|----------|----------|----------|----------|
|                                         | -4 weeks | 0 week          | 2 weeks | 4 weeks | 8 weeks         | 12 weeks | 16 weeks | 20 weeks | 24 weeks |
| Measurements of pressure-pain threshold |          | ×               | ×       | ×       |                 |          |          |          |          |
| VAS                                     | ×        | ×               |         | ×       | ×               | ×        | ×        | ×        | ×        |
| NPQ                                     |          | ×               |         | ×       | ×               | ×        | ×        | ×        | ×        |
| MPQ                                     |          | ×               |         | ×       | ×               | ×        | ×        | ×        | ×        |
| SF-12                                   |          | ×               |         | ×       | ×               | ×        | ×        | ×        | ×        |
| NDI                                     |          | ×               |         | ×       | ×               | ×        | ×        | ×        | ×        |
| CROM                                    |          | ×               |         | ×       |                 |          |          |          |          |
| SAS                                     |          | ×               |         | ×       | ×               | ×        | ×        | ×        | ×        |
| SDS                                     |          | ×               |         | ×       | ×               | ×        | ×        | ×        | ×        |
| Adverse events                          |          | ×               | ×       | ×       | ×               | ×        | ×        | ×        | ×        |

### Data and Safety Monitoring Board

To ensure the integrity of the RCT and protect the rights and health of the participants, we will set up a Data and Safety Monitoring Board. The Data and Safety Monitoring Board is an independent advisory group that will maintain the scientific and ethical standards of the RCT, and will be

1  
2  
3  
4 responsible for data evaluation during the study period. The Data and Safety Monitoring Board will  
5  
6 be developed in accordance with the Operational Guidelines for the Establishment and Functioning of  
7  
8 Data and Safety Monitoring Boards of the World Health Organization.  
9

### 10 11 **Safety and acupuncture-related adverse events**

12  
13 Acupuncture may cause several adverse events, including bleeding, hematoma, fainting, serious  
14  
15 pain, and local infection.[45] Hence, we will record any acupuncture-related adverse events that  
16  
17 occur during the treatment and follow-up phases, and record the potential reasons for these adverse  
18  
19 events. The number and type of adverse events in each group will be calculated. Patients will receive  
20  
21 appropriate intervention for any adverse events that occur. Serious adverse events will be  
22  
23 immediately reported to the primary investigator, and the affected participants will be withdrawn  
24  
25 from the study.  
26  
27  
28

### 29 **Patients and public involvement**

30  
31 Patients and the public are not involved in the design or conduct of the study or the outcome  
32  
33 measures, and no attempt will be made to assess the burden of the intervention on the patients  
34  
35 themselves.  
36  
37  
38

### 39 **Sample size calculation**

40  
41 The sample size calculation was based on the superiority test. The primary outcome is the change  
42  
43 in the VAS score from baseline to week 4. The clinical difference in the VAS score after acupuncture  
44  
45 treatment is reportedly 6.3;[17] therefore, we conservatively estimated that there would be a VAS  
46  
47 score change of 5 between the highly-sensitive acupoints group and the low/non-sensitive acupoints  
48  
49 group, 10 between the highly-sensitive acupoints group and the sham acupuncture group, and 20  
50  
51 between the highly-sensitive acupoints group and the waiting-list control group. Considering a two-  
52  
53 sided significance level of 5% and power of 95%, 621 participants are required with a 1:1:1:1 group  
54  
55 allocation rate, as calculated by Fisher's exact test in G\*Power (version 3.1.5). To minimize attrition  
56  
57 bias, we assumed a dropout rate of 15%, making it necessary to include at least 716 participants in  
58  
59 total.  
60

### Statistical analysis

The included patients will be divided into the full analysis set (FAS), per protocol set (PPS), and safety set (SS). The FAS population will consist of all participants for whom the primary outcome is evaluable. The FAS population will be used as the primary population for all efficacy analyses. The PPS population will consist of all participants who undergo the planned interventions. The SS will consist of all randomized participants who received at least one acupuncture treatment during the study period. All data will be managed by the data coordinating center through a third party (the Brightech-Magnsoft Data Services Company).

A statistician blinded to the group allocations will conduct all analyses using the SAS version 9.4 software package (SAS Institute Inc., Cary, NC, USA). First, the basic information of the four groups will be described, including patient characteristics, medical characteristics, outcome variables, and adverse events. If an adjustment is needed for a baseline value that differs between groups, covariance analysis will be performed. Data will be presented as mean (SD) for continuous variables, and as frequency (percentage) for categorical variables. Group comparisons will then be undertaken using  $\chi^2$  tests for categorical characteristics, and analysis of variance for continuous variables. The primary analyses will examine whether acupuncture performed in the highly-sensitive acupoints group will achieve statistically better treatment outcomes (pain, quality of life, neck function, and emotional disorders) than acupuncture in the low/non-sensitive acupoints group, sham acupuncture group, and waiting-list control group. To accommodate the correlation between repeated measures from the same participant, generalized linear models with random effects will be fitted to assess the effect of intervention on outcome variables over time, while accounting for the effects of potential confounders (e.g., age, sex, analgesic medications, and other treatments). We will use the last value carried forward method to impute missing data for the primary and secondary outcomes. All analyses will use two-sided tests, and a p value of less than 0.05 will be considered statistically significant.

### ETHICS AND DISSEMINATION

This RCT was designed in accordance with the principles of the Declaration of Helsinki. The trial protocol has been approved by the Ethics Committee of the First Affiliated Hospital of Chengdu University of Traditional Chinese Medicine (permission number: 2017KL-038), and is registered

1  
2  
3  
4 on the primary registry in the World Health Organization registry network (Chinese Clinical Trial  
5 Registry: no. ChiCTR1800016371). Signed consent will be obtained from each patient after they  
6 have been informed of the study procedures, possible risks, and their right to withdraw from the  
7 trial.  
8  
9

10  
11 This study will be the first multicenter RCT to evaluate the safety and effectiveness of acupuncture  
12 at sensitive points for chronic neck pain. The concept of sensitive points comes from the theory of  
13 traditional Chinese medicine, which purports a link between disease status and the condition of  
14 acupuncture points; when the body is affected by diseases, particular points become sensitive.[25]  
15 The results of this study may provide further evidence for the effectiveness of acupuncture in  
16 relieving chronic neck pain.  
17  
18  
19  
20  
21  
22

23 This study has some strengths that warrant mention. In contrast with previous studies,[31] this trial  
24 established a sham group to investigate the placebo effect of acupuncture. The creation of a waiting-  
25 list control group will rule out self-healing of the disease, and control for the Hawthorne effect. The  
26 waiting-list control group will receive the same acupuncture intervention after the 24-week follow-  
27 up period. This design provides participants with a guarantee that they are going to receive  
28 acupuncture treatment, overcoming the potential problem of control participants being  
29 disappointed.[46] In addition, the blinding of the patients, operators, acupuncturists, assessors, and  
30 statisticians will decrease potential bias.  
31  
32  
33  
34  
35  
36  
37

38 As this will be the first study to investigate the effectiveness of acupuncture at sensitive acupoints  
39 for chronic neck pain, this RCT may have some limitations. There are several types of point  
40 sensitization, such as pain and heat.[47 48] However, in this trial, we only quantified pain as the  
41 indicator of sensitization, which might overlook the other forms of acupoint sensitization. Further  
42 study is needed to confirm the improvement in clinical efficacy of acupuncture at different kinds of  
43 sensitive acupoints. If the results show that acupuncture therapy at sensitive acupoints is safe and  
44 effective in reducing chronic neck pain, this study will provide evidence to support the superior  
45 clinical efficacy of performing acupuncture at sensitive acupoints compared with low/non-sensitive  
46 acupoints.  
47  
48  
49  
50  
51  
52  
53  
54  
55  
56  
57

## 58 CONCLUSION

59 This article describes the design and protocol of a study that aims to evaluate the effectiveness and  
60

1  
2  
3  
4 safety of acupuncture for chronic neck pain. The results will reveal whether sensitive acupoints have  
5  
6 specificity, and whether acupuncture at highly-sensitive acupoints is superior to acupuncture at  
7  
8 low/non-sensitive points or sham acupuncture at non-acupoints.  
9

### 10 11 **Trial status**

12  
13 This study is currently in the recruitment phase. The first patient was enrolled in June 2018, and the  
14  
15 study is expected to end in December 2019.  
16

### 17 18 19 **Acknowledgments**

20  
21 We thank the staff of Brightech-Magnsoft Data Services Company for their substantial contributions  
22  
23 to the design and statistical analysis plan of this trial. We thank the staff of Chengdu CTC Tianfu  
24  
25 Digital Technology Inc. for providing images. We acknowledge the help and contributions from the  
26  
27 RAs, acupuncturists, experts, and investigators in each center. We thank the patients with chronic  
28  
29 neck pain for participating in this trial. We also thank Dr. Kelly Zammit, BVSc, from Liwen Bianji,  
30  
31 Edanz Group China ([www.liwenbianji.cn/ac](http://www.liwenbianji.cn/ac)), for editing the English text of a draft of this  
32  
33 manuscript.  
34  
35

### 36 37 **Authors' contributions**

38  
39 MSS, GYG, JC, DJC, HZ, LZ, and FRL participated in the design of the trial, in creating the data  
40  
41 analysis plan, and in drafting the manuscript. XSM, MXY, XJL, and JRD collected the information  
42  
43 needed for the performance of this trial in each center. All of the authors discussed, read, and revised  
44  
45 the manuscript, and gave final approval for the publication of this study protocol.  
46  
47

### 48 49 **Funding**

50  
51 This work was financially supported by the National Natural Science Foundation of China (no.  
52  
53 81590951, no. 81722050).  
54

### 55 56 **Competing interests**

57  
58 The authors declare that they have no competing interests.  
59  
60

### Ethics approval

The study protocol has been approved by the institutional review board and ethics committee of the First Affiliated Hospital of Chengdu University of Traditional Chinese Medicine (May 2018).

### Provenance and peer review

Not commissioned; internally peer reviewed.

### Open Access

This is an Open Access article distributed in accordance with the Creative Commons Attribution Non Commercial (CCBY-NC 3.0) license, which permits others to distribute, remix, adapt, build upon this work noncommercially, and license their derivative works on different terms, provided the original work is properly cited and the use is non-commercial. See: <http://creativecommons.org/licenses/by-nc/3.0/>

### REFERENCES

1. Sarikozuel H, Cooper R. Managing pain from cervical spondylosis. *The Practitioner* 1999;**243**(1597):334-8
2. Bogduk N, Lord SM. Cervical spine disorders. *Current opinion in rheumatology* 1998;**10**(2):110-15
3. Hoggjohnson S, Velde GVD, Carroll LJ, et al. The burden and determinants of neck pain in the general population: Results of the bone and joint decade 2000–2010 Task force on neck pain and its associated disorders. *Best evidence on the burden and determinants of neck. European Spine Journal* 2008;**17**(1):39-51
4. Wang B, Duan YP, Zhang YC, et al. [Epidemiologic research on the clinical features of patients with cervical spondylosis]. *Zhong nan da xue xue bao Yi xue ban = Journal of Central South University Medical sciences* 2004;**29**(4):472
5. Collaborators UBOD. The State of US Health, 1990-2010: Burden of Diseases, Injuries, and Risk Factors. *Jama the Journal of the American Medical Association* 2013;**310**(6):591-608
6. Hoy D, March L, Woolf A, et al. The global burden of neck pain: estimates from the global burden of disease 2010 study. *Annals of the rheumatic diseases* 2014;**73**(6):968
7. Borghouts JAJ, Koes BW, Vondeling H, et al. Cost-of-illness of neck pain in The Netherlands in 1996. *Pain* 1999;**80**(3):629-36
8. Kleinman N, Patel AA, Benson C, et al. Economic burden of back and neck pain: effect of a neuropathic component. *Popul Health Manag* 2014;**17**(4):224-32 doi: 10.1089/pop.2013.0071[published Online First: Epub Date]].
9. Berman BM, Swyers JP. Establishing a research agenda for investigating alternative medical interventions for chronic pain. *Primary care* 1997;**24**(4):743-58
10. Witt CM, Jena S, Brinkhaus B, et al. Acupuncture for patients with chronic neck pain. *Pain*

- 2006;**125**(1-2):98-106
11. White AR, Ernst E. A systematic review of randomized controlled trials of acupuncture for neck pain. *Rheumatology* 1999;**38**(2):143-7
  12. Irnich D, Behrens N, Gleditsch JM, et al. Immediate effects of dry needling and acupuncture at distant points in chronic neck pain: results of a randomized, double-blind, sham-controlled crossover trial. *Pain* 2002;**99**(1-2):83-9
  13. Cerezo-Télez E, Torres-Lacomba M, Fuentes-Gallardo I, et al. Effectiveness of dry needling for chronic nonspecific neck pain: a randomized, single-blinded, clinical trial. *Pain* 2016;**157**(9):1905-17
  14. Madsen MV, Gøtzsche PC, Hróbjartsson A. Acupuncture treatment for pain: systematic review of randomised clinical trials with acupuncture, placebo acupuncture, and no acupuncture groups. *BMJ (Clinical research ed)* 2009;**338**(7690):330-33
  15. Pilkington K. Evidence on Acupuncture and Pain: Reporting on a Work in Progress. *JAMS Journal of Acupuncture and Meridian Studies* 2015;**8**(5):217-19 doi: 10.1016/j.jams.2015.07.001[published Online First: Epub Date]].
  16. Seo SY, Lee KB, Shin JS, et al. Effectiveness of Acupuncture and Electroacupuncture for Chronic Neck Pain: A Systematic Review and Meta-Analysis. *The American journal of Chinese medicine* 2017;**45**(8):1573-95 doi: 10.1142/s0192415x17500859[published Online First: Epub Date]].
  17. Basiouni A. Acupuncture versus placebo for the treatment of chronic mechanical neck pain: a randomized, controlled trial. *Annals of internal medicine* 2004;**141**(12):911
  18. Irnich D, Behrens N, Gleditsch JM, et al. Immediate effects of dry needling and acupuncture at distant points in chronic neck pain: results of a randomized, double-blind, sham-controlled crossover trial. *Pain* 2002;**99**(1):83-89
  19. Vas J, Perea-Milla E, Méndez C, et al. Efficacy and safety of acupuncture for chronic uncomplicated neck pain: A randomised controlled study ☆. *Pain* 2006;**126**(1):245-55
  20. Ho LF, Lin ZX, Leung AWN, et al. Efficacy of abdominal acupuncture for neck pain: A randomized controlled trial. 2017;**12**(7):e0181360 doi: 10.1371/journal.pone.0181360[published Online First: Epub Date]].
  21. Yang Y, Yan X, Deng H, et al. The efficacy of traditional acupuncture on patients with chronic neck pain: study protocol of a randomized controlled trial. *Trials* 2017;**18**(1):312
  22. Persson AL, Brogårdh C, Sjölund BH. Tender or not tender: test-retest repeatability of pressure pain thresholds in the trapezius and deltoid muscles of healthy women. *Journal of rehabilitation medicine* 2004;**36**(1):17
  23. Fischer AA. Pressure algometry over normal muscles. Standard values, validity and reproducibility of pressure threshold. *Pain* 1987;**30**(1):115-26
  24. Yan CQ, Zhang S, Li QQ, et al. Detection of peripheral and central sensitisation at acupoints in patients with unilateral shoulder pain in Beijing: a cross-sectional matched case-control study. *BMJ open* 2017;**7**(6):e014438 doi: 10.1136/bmjopen-2016-014438[published Online First: Epub Date]].
  25. Luo YN, Zhou YM, Zhong X, et al. Observation of Pain-Sensitive Points in Patients with Knee Osteoarthritis: A Pilot Study. *European Journal of Integrative Medicine* 2018
  26. Chen S, Miao Y, Nan Y, et al. The Study of Dynamic Characteristic of Acupoints Based on the Primary Dysmenorrhea Patients with the Tenderness Reflection on Diji (SP 8). *Evidence-Based Complementray and Alternative Medicine,2015,(2015-6-16)* 2015;**2015**:158012



- 1
- 2
- 3
- 4 27. Chae Y, Kim H, Hj, Park H, et al. The alteration of pain sensitivity at disease-specific acupuncture
- 5 points in premenstrual syndrome. *Journal of Physiological Sciences* 2007;**57**(2):115-19
- 6
- 7 28. Tunks E, Crook J, Norman G, et al. Tender points in fibromyalgia. *Pain* 1988;**34**(1):11
- 8
- 9 29. Zhang CR, Xiao HH, Chen RX. Observation on curative effect of moxibusting on heat-sensitive points
- 10 on pressure sores. *China Journal of Traditional Chinese Medicine & Pharmacy* 2010
- 11
- 12 30. Chen RX, Kang MF. Acupoint heat-sensitization and its clinical significance. *Journal of Traditional*
- 13 *Chinese Medicine* 2006;**2001**(4):488-9
- 14
- 15 31. Tang L, Jia P, Zhao L, et al. Acupuncture treatment for knee osteoarthritis with sensitive points:
- 16 protocol for a multicentre randomised controlled trial. *BMJ open* 2018;**8**(10):e023838 doi:
- 17 10.1136/bmjopen-2018-023838[published Online First: Epub Date]].
- 18
- 19 32. Schulz KF, Altman DG, Moher D. CONSORT 2010 Statement: updated guidelines for reporting
- 20 parallel group randomised trials. *Bmj British Medical Journal* 2010;**340**(7748):698-702
- 21
- 22 33. Hugh MP, Altman DG, Richard H, et al. Revised STandards for Reporting Interventions in Clinical
- 23 *Trials of Acupuncture (STRICTA): Extending the CONSORT Statement. Journal of Evidence-*
- 24 *Based Medicine* 2010;**3**(3):35-46
- 25
- 26 34. Shahidi B, Maluf KS. Adaptations in Evoked Pain Sensitivity and Conditioned Pain Modulation after
- 27 *Development of Chronic Neck Pain. BioMed research international* 2017;**2017**(3,
- 28 *supplement):1-6*
- 29
- 30 35. Nijs J, Kosek E, Van OJ, et al. Dysfunctional endogenous analgesia during exercise in patients with
- 31 *chronic pain: to exercise or not to exercise? Pain physician* 2012;**15**(3 Suppl):ES205
- 32
- 33 36. Johnston V, Jull G, Darnell R, et al. Alterations in cervical muscle activity in functional and stressful
- 34 *tasks in female office workers with neck pain. European Journal of Applied Physiology*
- 35 *2008;***103**(3):253-64
- 36
- 37 37. Olson SL, O'Connor DP, Birmingham G, et al. Tender point sensitivity, range of motion, and
- 38 *perceived disability in subjects with neck pain. Journal of Orthopaedic & Sports Physical*
- 39 *Therapy* 2000;**30**(1):13
- 40
- 41 38. Zhao L, Chen J, Li Y, et al. The Long-term Effect of Acupuncture for Migraine Prophylaxis: A
- 42 *Randomized Clinical Trial. JAMA internal medicine* 2017;**177**(4):508-15 doi:
- 43 10.1001/jamainternmed.2016.9378[published Online First: Epub Date]].
- 44
- 45 39. Melchart D, Streng A, Hoppe A, et al. Acupuncture in patients with tension-type headache:
- 46 *randomised controlled trial. BMJ (Clinical research ed)* 2005;**331**(7513):376-82 doi:
- 47 10.1136/bmj.38512.405440.8F[published Online First: Epub Date]].
- 48
- 49 40. Caraceni A, Cherny N, Fainsinger R, et al. Pain measurement tools and methods in clinical research
- 50 *in palliative care: recommendations of an Expert Working Group of the European Association*
- 51 *of Palliative Care. J Pain Symptom Manage* 2002;**23**(3):239-55
- 52
- 53 41. Carlsson AM. Assessment of chronic pain. I. Aspects of the reliability and validity of the visual
- 54 *analogue scale. Pain* 1983;**16**(1):87-101
- 55
- 56 42. Saltychev M, Mattie R, McCormick Z, et al. Psychometric properties of the neck disability index
- 57 *amongst patients with chronic neck pain using item response theory. Disability &*
- 58 *Rehabilitation* 2017:1-6
- 59
- 60 43. Laurent B. [Chronic pain: emotional and cognitive consequences]. *Bulletin De Lacadémie Nationale*
- De Médecine* 2015;**199**(4-5):543
44. Maletic V, Raison CL. Neurobiology of depression, fibromyalgia and neuropathic pain. *Frontiers in*
- Bioscience* 2009;**14**(6):5291

- 1  
2  
3  
4 45. Ling Z, Zhang FW, Ying L, et al. Adverse events associated with acupuncture: three multicentre  
5 randomized controlled trials of 1968 cases in China. *Trials*,12,1(2011-03-24) 2011;**12**(1):1-9  
6  
7 46. Ainsworth HR, Kang'Ombe AR. Conceptual, Design, and Statistical Complications Associated with  
8 Participant Preference. *Annals of the American Academy of Political & Social Science*  
9 2010;**628**(1):176-88  
10  
11 47. Ben H, Li L, Rong PJ, et al. Observation of Pain-Sensitive Points along the Meridians in Patients with  
12 Gastric Ulcer or Gastritis. *Evidence-based complementary and alternative medicine : eCAM*  
13 2012;**2012**:130802 doi: 10.1155/2012/130802[published Online First: Epub Date]].  
14  
15 48. Chen RX, Ming-Fei R, Chen MR. Return of Qibo:on hypothesis of sensitization state of acupoints.  
16 *Zhongguo zhen jiu = Chinese acupuncture & moxibustion* 2011;**31**(2):134-38  
17

18 **Figure 1** Flowchart of the trial design.  
19

20  
21 **Figure 2** The test regions that will be used in the study. Regions 1 and 2 are each bordered by the  
22 respective ipsilateral mastoid, sternal end of the clavicle, anterior axillary line, acromion, and C7  
23 spinous process. Region 3 is the triangular region bordered by both sides of the mastoid and the C7  
24 spinous process. Regions 4 and 5 are each bordered by the respective ipsilateral C7 spinous process,  
25 acromion, and axillary line; the two regions are divided by the posterior midline.  
26  
27  
28  
29

30 **Figure 3** Locations of the five non-acupoints used in the study.  
31  
32  
33  
34  
35  
36  
37  
38  
39  
40  
41  
42  
43  
44  
45  
46  
47  
48  
49  
50  
51  
52  
53  
54  
55  
56  
57  
58  
59  
60

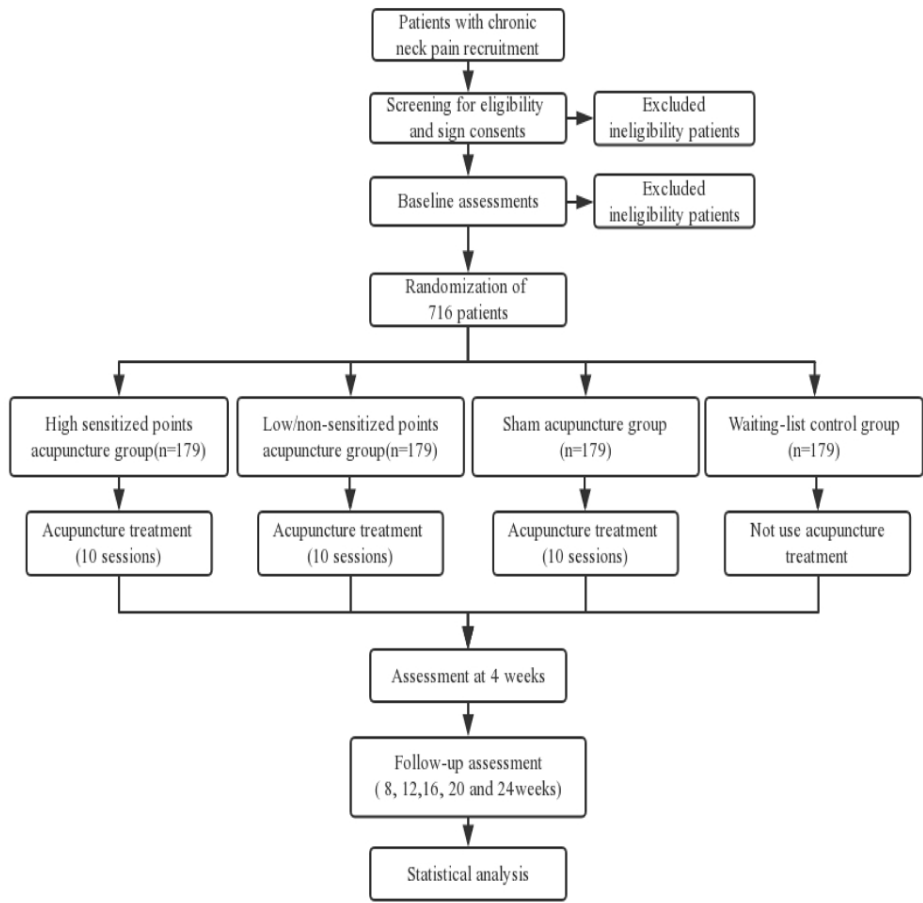

Figure 1 Flowchart of the trial design.

90x90mm (300 x 300 DPI)

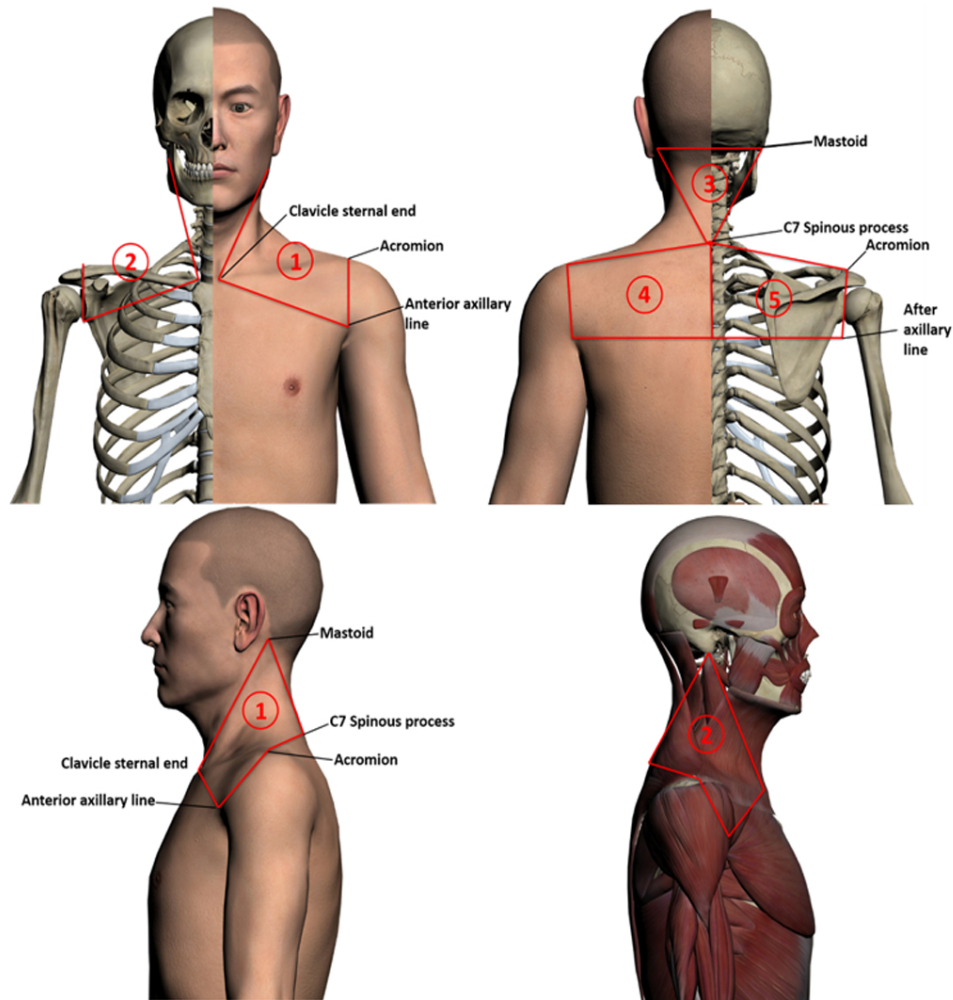

Figure 2 The test regions that will be used in the study. Regions 1 and 2 are each bordered by the respective ipsilateral mastoid, sternal end of the clavicle, anterior axillary line, acromion, and C7 spinous process. Region 3 is the triangular region bordered by both sides of the mastoid and the C7 spinous process. Regions 4 and 5 are each bordered by the respective ipsilateral C7 spinous process, acromion, and axillary line; the two regions are divided by the posterior midline.

90x90mm (300 x 300 DPI)

1  
2  
3  
4  
5  
6  
7  
8  
9  
10  
11  
12  
13  
14  
15  
16  
17  
18  
19  
20  
21  
22  
23  
24  
25  
26  
27  
28  
29  
30  
31  
32  
33  
34  
35  
36  
37  
38  
39  
40  
41  
42  
43  
44  
45  
46  
47  
48  
49  
50  
51  
52  
53  
54  
55  
56  
57  
58  
59  
60

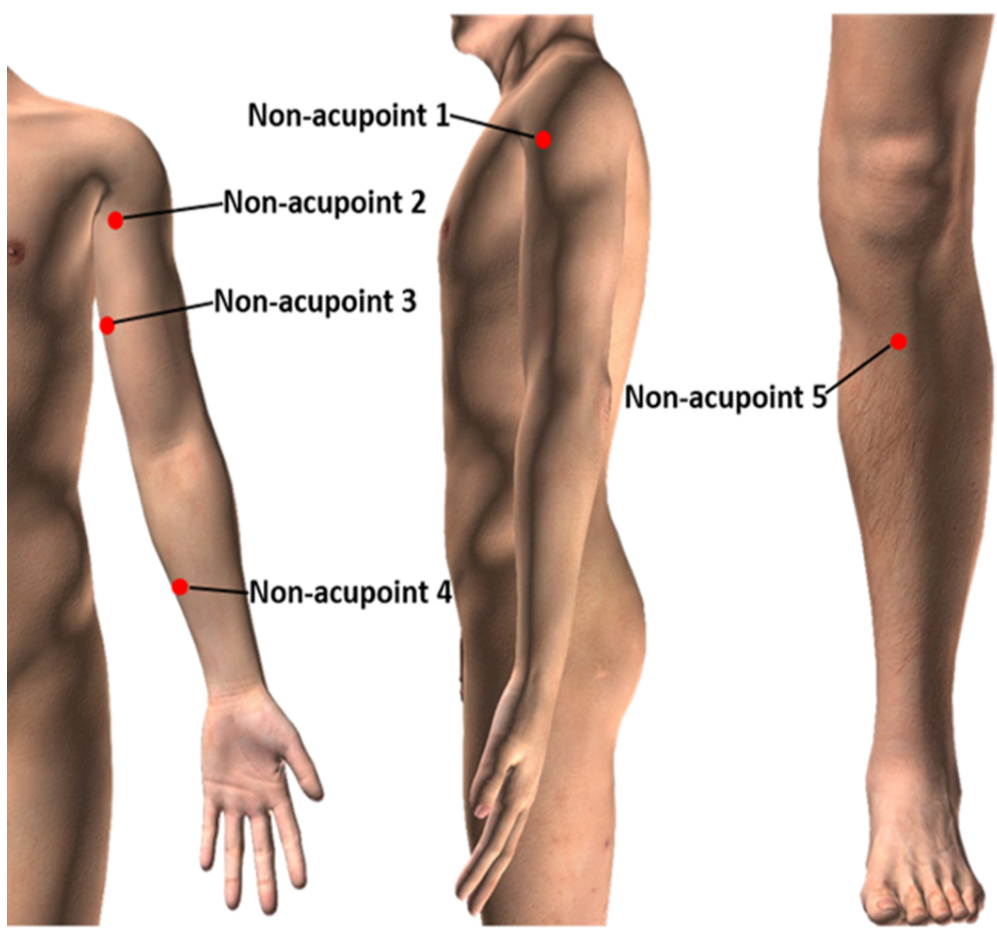

Figure 3 Locations of the five non-acupoints used in the study.

90x90mm (300 x 300 DPI)

Appendix Table

| Regions           | Acupoints             | Pressure pain threshold of healthy subjects (gf) |
|-------------------|-----------------------|--------------------------------------------------|
| Region 1          | Jianjing (GB-21) L    | 2234                                             |
|                   | Jianzhongshu(SI-15) L | 2648                                             |
| Region 2          | Jianjing (GB-21) R    | 2222                                             |
|                   | Jianzhongshu(SI-15) R | 2650                                             |
| Region 3          | Wangu(GB-12) L        | 1616                                             |
|                   | Fengchi(GB-20) L      | 1909                                             |
|                   | Tianzhu(BL-10) L      | 2067                                             |
|                   | Dazhui(DU-14)         | 2978                                             |
|                   | Wangu(GB-12) R        | 1738                                             |
|                   | Fengchi(GB-20) R      | 2037                                             |
|                   | Tianzhu(BL-10) R      | 2083                                             |
| Region 4          | Dazhu(BL-11) L        | 2924                                             |
|                   | Jianwaishu(SI-14) L   | 2856                                             |
|                   | Tianliao(SJ-15) L     | 2788                                             |
|                   | Jugu(LI-16) L         | 2611                                             |
|                   | Tianzong(SI-11) L     | 2484                                             |
| Region 5          | Dazhu(BL-11) R        | 2932                                             |
|                   | Jianwaishu(SI-14) R   | 2849                                             |
|                   | Tianliao(SJ-15) R     | 3075                                             |
|                   | Jugu(LI-16) R         | 2652                                             |
|                   | Tianzong(SI-11) R     | 2478                                             |
| Distant acupoints | Shousanli(LI-10) L    | 1645                                             |
|                   | Lieque(LU-7) L        | 2003                                             |
|                   | Zhongzhu(SJ-3) L      | 2011                                             |
|                   | Houxi(SI-3) L         | 2326                                             |
|                   | Shousanli(LI-10) R    | 1710                                             |
|                   | Lieque(LU-7) R        | 2192                                             |
|                   | Zhongzhu(SJ-3) R      | 2017                                             |
|                   | Houxi(SI-3) R         | 2419                                             |

L: left; R: right
