# Supplementary material for: Acupuncture for chronic neck pain with sensitive points: study protocol for a multicentre randomised controlled trial
Source: PubMed Central journal article supplement — BMJ Open. 2019 Jul 30;9(7):e026904. doi: 10.1136/bmjopen-2018-026904 (PMC6678032; doi:10.1136/bmjopen-2018-026904), 2019-07-30
Supplement: bmjopen-2018-026904supp001.pdf [file bmjopen-2018-026904supp001.pdf]

Appendix Table

| Regions           | Acupoints             | Pressure pain threshold of healthy subjects (gf) |
|-------------------|-----------------------|--------------------------------------------------|
| Region 1          | Jianjing (GB-21) L    | 2234                                             |
|                   | Jianzhongshu(SI-15) L | 2648                                             |
| Region 2          | Jianjing (GB-21) R    | 2222                                             |
|                   | Jianzhongshu(SI-15) R | 2650                                             |
| Region 3          | Wangu(GB-12) L        | 1616                                             |
|                   | Fengchi(GB-20) L      | 1909                                             |
|                   | Tianzhu(BL-10) L      | 2067                                             |
|                   | Dazhui(DU-14)         | 2978                                             |
|                   | Wangu(GB-12) R        | 1738                                             |
|                   | Fengchi(GB-20) R      | 2037                                             |
|                   | Tianzhu(BL-10) R      | 2083                                             |
| Region 4          | Dazhu(BL-11) L        | 2924                                             |
|                   | Jianwaishu(SI-14) L   | 2856                                             |
|                   | Tianliao(SJ-15) L     | 2788                                             |
|                   | Jugu(LI-16) L         | 2611                                             |
|                   | Tianzong(SI-11) L     | 2484                                             |
| Region 5          | Dazhu(BL-11) R        | 2932                                             |
|                   | Jianwaishu(SI-14) R   | 2849                                             |
|                   | Tianliao(SJ-15) R     | 3075                                             |
|                   | Jugu(LI-16) R         | 2652                                             |
|                   | Tianzong(SI-11) R     | 2478                                             |
| Distant acupoints | Shousanli(LI-10) L    | 1645                                             |
|                   | Lieque(LU-7) L        | 2003                                             |
|                   | Zhongzhu(SJ-3) L      | 2011                                             |
|                   | Houxi(SI-3) L         | 2326                                             |
|                   | Shousanli(LI-10) R    | 1710                                             |
|                   | Lieque(LU-7) R        | 2192                                             |
|                   | Zhongzhu(SJ-3) R      | 2017                                             |
|                   | Houxi(SI-3) R         | 2419                                             |

L: left; R: right
